# Supplementary material for: Sub-synaptic, multiplexed analysis of proteins reveals Fragile X related protein 2 is mislocalized in Fmr1 KO synapses
Source: eLife. 2016 Oct 22;5:e20560. doi: 10.7554/eLife.20560 (PMC5098911; doi:10.7554/eLife.20560)
Supplement: Figure 5–figure supplement 1–source data 1. — Source data for the 1D histograms of protein distribution in Layer 5. DOI: http://dx.doi.org/10.7554/eLife.20560.012 [file elife-20560-fig5-figsupp1-data1.xlsx]

## Sheet: KDM L5VG1
Layer5 - VGluT1	500	480	460	440	420	400	380	360	340	320	300	280	260	240	220	200	180	160	140	120	100	80	60	40	20	20	40	60	80	100	120	140	160	180	200	220	240	260	280	300	320	340	360	380	400	420	440	460	480
VGluT1	0.00123661	0.00121719	0.00115256	0.00115522	0.00112047	0.00109147	0.000999281	0.000955864	0.000936135	0.000809234	0.000739522	0.000667277	0.000617464	0.000531982	0.000467967	0.000462135	0.000400885	0.000402527	0.000458392	0.000547339	0.000670427	0.000851057	0.00113845	0.0013064	0.00178073	0.00674673	0.00780829	0.00954016	0.00892946	0.00954927	0.00780591	0.00742993	0.00596338	0.00438433	0.00395794	0.00321336	0.00284249	0.00224089	0.00207247	0.00194577	0.00161445	0.00155755	0.00154164	0.00145474	0.0014095	0.00136335	0.00138016	0.0013472	0.00130951
Bassoon	0.001018	0.00103609	0.00101875	0.00100035	0.00101509	0.00102678	0.000977812	0.000955647	0.0010082	0.0010116	0.00102536	0.00109624	0.00113902	0.00117804	0.00135536	0.00157306	0.00178447	0.00210858	0.0026498	0.00312519	0.00364387	0.00431452	0.00551933	0.0067111	0.00665886	0.00847938	0.0074575	0.00685006	0.00613105	0.00489375	0.00388602	0.00360837	0.00308546	0.00253064	0.00220291	0.00207491	0.00188816	0.00163627	0.0015883	0.00150887	0.00135784	0.00133571	0.00130263	0.0012529	0.0012069	0.00119194	0.00119433	0.00113155	0.00110735
Synph	0.00131771	0.00134406	0.00130158	0.00127095	0.00123055	0.00118684	0.00116169	0.0011031	0.00113713	0.00106207	0.00103327	0.00104293	0.00105725	0.00106922	0.00113174	0.00121555	0.00128354	0.00144358	0.00176703	0.00197698	0.00213751	0.00251576	0.0031992	0.00352939	0.0039284	0.0087078	0.00942798	0.00943231	0.00903316	0.00872391	0.00709376	0.00667493	0.00553883	0.00439412	0.00390961	0.00333151	0.00302224	0.0024436	0.00227262	0.00216109	0.00182171	0.00175564	0.00166952	0.00160875	0.00151669	0.00147898	0.00150502	0.00145189	0.00140426
VGluT2	0.000323311	0.000334066	0.000332333	0.000322218	0.000341102	0.000355485	0.00032004	0.000320501	0.000340748	0.000343931	0.000334333	0.000341053	0.000351527	0.000328546	0.000359974	0.000388374	0.000381018	0.000427892	0.000462828	0.000540433	0.000572247	0.000611015	0.000900675	0.000906051	0.00100368	0.000846824	0.000822837	0.00070257	0.000780915	0.000751584	0.00054078	0.000563226	0.000519948	0.000468928	0.000430164	0.000429512	0.000418233	0.000381173	0.000404431	0.000400696	0.000353327	0.000355205	0.000354598	0.000334415	0.000334496	0.000320678	0.000317635	0.000310401	0.000298788
NR1	0.00122642	0.00123535	0.00121233	0.00119652	0.00121866	0.00120853	0.00114101	0.00112392	0.00115325	0.00113027	0.00111479	0.0011665	0.00117876	0.0012511	0.00143826	0.00174392	0.00220167	0.0028982	0.00418024	0.00600001	0.00834527	0.0122858	0.0177829	0.0212395	0.0230848	0.0139726	0.00876105	0.00690861	0.0048599	0.0037487	0.00276957	0.00251264	0.0021162	0.00178516	0.00163366	0.0015943	0.00150264	0.0013769	0.00144589	0.00147539	0.00136495	0.00139426	0.0013826	0.00137097	0.00131949	0.00134949	0.00137004	0.00132471	0.0012953
GluR2	0.000758658	0.000755229	0.000708293	0.000715849	0.000698496	0.000676184	0.000639285	0.000628424	0.000648572	0.000593816	0.000594369	0.000602315	0.000656438	0.000710711	0.000855757	0.00111545	0.00154323	0.00232363	0.00344829	0.00559771	0.00816855	0.0133239	0.0202183	0.0249586	0.0282866	0.0171649	0.0118185	0.00770978	0.00524643	0.00363189	0.00255819	0.00199131	0.00170112	0.00138035	0.00116161	0.00111011	0.00103947	0.000963594	0.000959801	0.000938586	0.000860422	0.000886424	0.000880708	0.000887155	0.000859152	0.000845784	0.000829508	0.000806883	0.000804811
NR2A	0.000245185	0.000233411	0.00023761	0.00023116	0.000232196	0.000240768	0.000217071	0.000233328	0.000231156	0.000237329	0.000225984	0.000241138	0.000285807	0.000264414	0.000332158	0.000421491	0.000537114	0.000639633	0.000872424	0.00112921	0.00131841	0.00169276	0.00233455	0.00272869	0.00287075	0.00174936	0.0013252	0.00106618	0.000927042	0.000734677	0.000561303	0.000541814	0.000509753	0.000375925	0.000365183	0.000356463	0.00033506	0.000292671	0.000291157	0.000294261	0.000262923	0.000274588	0.000281043	0.000263178	0.000264128	0.000252412	0.000268008	0.000255604	0.00024899
NR2B	0.000490494	0.000497517	0.00048189	0.000480818	0.000470116	0.000501275	0.000457001	0.000463837	0.000477968	0.000457671	0.000461255	0.00049781	0.000505129	0.000523571	0.000627228	0.000816639	0.00101463	0.00124839	0.00188384	0.00252778	0.00324273	0.00446727	0.00611018	0.00755394	0.00793235	0.00532608	0.00393663	0.00269935	0.00209606	0.00159385	0.00125087	0.00105849	0.000967803	0.000764088	0.000665386	0.000685383	0.000625576	0.00059352	0.000605959	0.000585255	0.000530978	0.000561894	0.000562442	0.000544331	0.000545275	0.00053401	0.000537601	0.000516003	0.000515939
[truncated: 1 more columns]

## Sheet: KDM L5VG2
Layer5 - VGluT2	500	480	460	440	420	400	380	360	340	320	300	280	260	240	220	200	180	160	140	120	100	80	60	40	20	20	40	60	80	100	120	140	160	180	200	220	240	260	280	300	320	340	360	380	400	420	440	460	480
VGluT1	0.000228057	0.000238461	0.000222824	0.000230423	0.000223348	0.000235094	0.000210485	0.00023198	0.000227704	0.000232736	0.000214022	0.000235096	0.000232742	0.000239863	0.000227437	0.000259632	0.000269539	0.000240771	0.000258265	0.000290261	0.000257219	0.000272243	0.000377546	0.000276017	0.000212059	0.000827102	0.000898224	0.00102931	0.00103942	0.00107043	0.000911812	0.000880067	0.000685235	0.000542881	0.00053113	0.000447076	0.000434605	0.000382617	0.000364952	0.000342913	0.000296923	0.000290352	0.00029396	0.00027685	0.000270463	0.000260282	0.000248372	0.000244254	0.0002439
Bassoon	0.00103317	0.0010566	0.00099965	0.000994951	0.000990806	0.00100822	0.000963891	0.000973844	0.000975155	0.00097663	0.000979243	0.00112229	0.00114035	0.00116259	0.00137891	0.00157422	0.00180312	0.00197191	0.00254069	0.00291392	0.00301314	0.00379098	0.00457774	0.00577336	0.00579629	0.00718849	0.00566354	0.00536184	0.00490208	0.00384551	0.00326639	0.00315849	0.00280613	0.00231045	0.00202486	0.00201489	0.00185374	0.00173644	0.00166509	0.00159451	0.00141868	0.00141501	0.00138892	0.00137093	0.00128121	0.0012763	0.00128765	0.0012113	0.00116995
Synph	0.00133689	0.00130455	0.00123704	0.00125105	0.00121768	0.0012032	0.00109886	0.00110924	0.00111389	0.001068	0.00104683	0.001056	0.00117122	0.00116833	0.0012134	0.00135567	0.00143444	0.00158909	0.00178849	0.00200167	0.00205163	0.00242296	0.00314622	0.0032662	0.00270965	0.00538833	0.00583373	0.00602787	0.00613703	0.00583538	0.00514378	0.00517471	0.00446436	0.00368475	0.003433	0.00313128	0.00293466	0.00243599	0.00233077	0.00230827	0.0019884	0.00194875	0.00184503	0.00175578	0.00170388	0.00163243	0.00162919	0.0015717	0.00151391
VGluT2	0.000319443	0.000359646	0.000309624	0.000297421	0.000301215	0.000315307	0.000286433	0.000250444	0.000255852	0.000254236	0.000235799	0.000212743	0.000216893	0.000188218	0.000236963	0.000256345	0.000252499	0.000300963	0.000332517	0.000429737	0.000532811	0.000789505	0.00132141	0.0015641	0.00216772	0.00315029	0.00334707	0.00302739	0.00302221	0.00289588	0.00222464	0.00227029	0.00201596	0.00172055	0.00160394	0.00154341	0.00139418	0.00119568	0.00116629	0.00109114	0.000924384	0.000901276	0.000881102	0.000801029	0.000763869	0.000723336	0.000697731	0.000663223	0.000623221
NR1	0.00119642	0.00121688	0.00116451	0.00116526	0.00116481	0.00120406	0.00115788	0.00111777	0.00113048	0.00113304	0.00109339	0.00119629	0.00120292	0.00127162	0.00139201	0.00174019	0.00213617	0.00267015	0.00353501	0.00525486	0.00706741	0.0100526	0.0141265	0.016423	0.0180486	0.0105699	0.00726143	0.00566458	0.00409593	0.00322808	0.00242851	0.0023272	0.00198893	0.00169063	0.00154884	0.00162621	0.00152843	0.00138762	0.00152103	0.00145782	0.00135792	0.00143951	0.00142781	0.00139289	0.00133373	0.00136378	0.00135686	0.00134788	0.00131427
GluR2	0.000754948	0.000755871	0.0006976	0.000704417	0.000729005	0.000698881	0.00064838	0.000623033	0.000670042	0.00061167	0.000632303	0.000635915	0.000697393	0.000711556	0.000919275	0.0010829	0.00149795	0.00219101	0.0033284	0.0048402	0.00701229	0.010495	0.0154479	0.0196662	0.0230674	0.0126255	0.00883096	0.00608169	0.00438409	0.00325493	0.00221568	0.00202842	0.00173455	0.0014256	0.00125455	0.00119482	0.00112395	0.0010286	0.00106965	0.00100081	0.000979545	0.00100296	0.000960425	0.000960875	0.000894634	0.000934748	0.000907769	0.000905483	0.000899593
NR2A	0.000238091	0.000239857	0.000239718	0.000215708	0.00023905	0.000239787	0.000226109	0.000217304	0.000254344	0.000232198	0.000217777	0.000263616	0.000286966	0.000271998	0.000341751	0.000396021	0.000446133	0.000532103	0.000736057	0.00102534	0.00116974	0.00126593	0.00199785	0.00230014	0.0024269	0.0014231	0.00107787	0.000874579	0.000703238	0.000704675	0.000510794	0.00049796	0.000483321	0.000402886	0.000363467	0.000332039	0.000308957	0.000297803	0.000315731	0.000312009	0.000253828	0.000286268	0.000285406	0.00026641	0.000275107	0.000272432	0.000275791	0.000266934	0.000253762
NR2B	0.000487299	0.000481948	0.000484096	0.000468985	0.00049316	0.000467627	0.000476521	0.000447391	0.000442841	0.000464934	0.0004333	0.000503336	0.000488008	0.000530224	0.000588241	0.000746031	0.000870579	0.00113162	0.00159479	0.00211099	0.00258444	0.00351194	0.00476652	0.00547434	0.00605548	0.00362465	0.00287432	0.00199808	0.00161573	0.00133217	0.000918533	0.00100202	0.000899868	0.000739515	0.000637825	0.000655363	0.000639429	0.000589867	0.000551029	0.000610349	0.000538254	0.000573354	0.000576644	0.0005447	0.000553787	0.000536224	0.000563562	0.00053337	0.000512095
[truncated: 1 more columns]

## Sheet: KDM L5Inh
Layer5 - Inhibitory	500	480	460	440	420	400	380	360	340	320	300	280	260	240	220	200	180	160	140	120	100	80	60	40	20	20	40	60	80	100	120	140	160	180	200	220	240	260	280	300	320	340	360	380	400	420	440	460	480
VGluT1	0.0011814	0.00118219	0.00118649	0.0011894	0.00118493	0.00118908	0.00114579	0.00113323	0.00117834	0.00114854	0.0011153	0.00109806	0.00107459	0.00096942	0.000966884	0.000876851	0.000794477	0.000712485	0.000628297	0.000676518	0.000493372	0.000439724	0.000439162	0.000532049	0.0003007	0.000601506	0.000535449	0.000595631	0.000766134	0.00060489	0.000664741	0.000857595	0.000957432	0.000964908	0.00096699	0.00104964	0.00103927	0.00103356	0.0011007	0.00109738	0.0010783	0.00112311	0.00115095	0.00113225	0.00114304	0.00115476	0.00115	0.00117729	0.00115708
Bassoon	0.00102335	0.00103599	0.001012	0.00100651	0.0010352	0.00105485	0.00100825	0.000997822	0.00108876	0.00105271	0.00104808	0.00108603	0.00113052	0.00109039	0.00113134	0.00136085	0.00141267	0.00137475	0.00160449	0.00207177	0.00199262	0.00238752	0.002991	0.00346943	0.00324082	0.0041965	0.00291786	0.00265156	0.00261688	0.00202845	0.00160285	0.0016186	0.00150685	0.00133092	0.00116884	0.00128229	0.00119713	0.00112107	0.00116244	0.00118629	0.00104526	0.00114131	0.00113952	0.0011106	0.00106852	0.00111317	0.00111414	0.00108619	0.00106368
Synph	0.00123993	0.00127095	0.00122477	0.00121494	0.00123113	0.00129872	0.00121291	0.00118934	0.00129472	0.00129779	0.00123556	0.00135063	0.00132769	0.00127809	0.0014011	0.00146816	0.00149593	0.00154172	0.00168098	0.00202166	0.00195723	0.00211219	0.00225462	0.00225978	0.00221955	0.00402779	0.00321293	0.00290039	0.00301536	0.00246865	0.00222431	0.00222822	0.00209304	0.00177188	0.0016296	0.00166405	0.00158805	0.00144759	0.00152979	0.00149952	0.00135708	0.00139501	0.00137929	0.00138066	0.00135553	0.00136268	0.00135645	0.00134632	0.00133238
VGluT2	0.000397334	0.000428289	0.000420976	0.000420272	0.000407414	0.000400557	0.000420931	0.000373843	0.000403738	0.000410285	0.000400118	0.000402703	0.00041054	0.000383557	0.000406509	0.000398449	0.000394149	0.000324555	0.000375948	0.000423951	0.00037125	0.000423438	0.000514447	0.000623782	0.000488638	0.000601506	0.000377077	0.000338061	0.000404957	0.000326533	0.000352027	0.000436093	0.000410871	0.000406591	0.000384364	0.000433758	0.000403626	0.000363678	0.000418927	0.000422361	0.00038842	0.000411719	0.000409702	0.000410058	0.000432595	0.000431152	0.000414051	0.000415887	0.000404238
GAD	0.000200752	0.000206714	0.000198798	0.00019848	0.000205928	0.000196521	0.000210679	0.000212588	0.000214964	0.000218991	0.000235654	0.000254357	0.000296971	0.000320351	0.00034821	0.000448235	0.000525499	0.000481439	0.000636199	0.000673161	0.000785723	0.000774864	0.00091821	0.000943791	0.000844246	0.00209473	0.00205999	0.00212281	0.00215695	0.00183064	0.00168701	0.00148939	0.00125417	0.00102212	0.000790066	0.00071669	0.000645069	0.00055464	0.000524154	0.000472251	0.000407945	0.000428818	0.000386282	0.00038532	0.000382397	0.000361071	0.000355689	0.000355774	0.000335007
Synapsin	0.000908946	0.000919645	0.000927165	0.000913152	0.000930937	0.00095869	0.000921469	0.000897958	0.000951361	0.000915724	0.000934805	0.000917645	0.000993118	0.000988911	0.00103775	0.00106171	0.00119155	0.00124256	0.00149068	0.0016121	0.00169178	0.00177786	0.00200915	0.0020471	0.00170211	0.00397859	0.00352985	0.00349913	0.00337221	0.00277311	0.00211297	0.00193574	0.00172828	0.0014427	0.00130368	0.00126768	0.00117127	0.00109528	0.00109132	0.00108738	0.00101214	0.00107075	0.00108289	0.00105256	0.00102289	0.00104545	0.00105676	0.00100006	0.00102226
GABRA	0.000529226	0.000531712	0.000507853	0.000518725	0.000535191	0.000557756	0.000545257	0.000534069	0.000579241	0.000575589	0.000577201	0.000591569	0.00066481	0.000647999	0.000732892	0.000818598	0.000914028	0.00109228	0.00143844	0.00197156	0.0021979	0.00325679	0.00463651	0.00568933	0.00585526	0.00343733	0.0025463	0.00169514	0.00155625	0.00115191	0.000882993	0.000927935	0.000903188	0.000780021	0.000666068	0.000750938	0.000706243	0.000610657	0.000660829	0.000630584	0.000586763	0.000605348	0.000636388	0.000606275	0.000583093	0.000561424	0.000576611	0.000568086	0.000550746
[truncated: 1 more columns]
