# Supplementary material for: Sub-synaptic, multiplexed analysis of proteins reveals Fragile X related protein 2 is mislocalized in Fmr1 KO synapses
Source: eLife. 2016 Oct 22;5:e20560. doi: 10.7554/eLife.20560 (PMC5098911; doi:10.7554/eLife.20560)
Supplement: Figure 5—source data 1. — Source data for the 1D histograms of protein distribution in Layer 4. DOI: http://dx.doi.org/10.7554/eLife.20560.010 [file elife-20560-fig5-data1.xlsx]

## Sheet: KDM L4VG1
Layer4 - VGluT1	500	480	460	440	420	400	380	360	340	320	300	280	260	240	220	200	180	160	140	120	100	80	60	40	20	20	40	60	80	100	120	140	160	180	200	220	240	260	280	300	320	340	360	380	400	420	440	460	480
VGluT1	0.00131412	0.00130062	0.00128249	0.00126616	0.00122651	0.00119899	0.00111148	0.00103612	0.000986879	0.000901188	0.000757677	0.000720114	0.000665291	0.000578973	0.000493445	0.000513756	0.000437525	0.000461866	0.000544011	0.000681172	0.000843785	0.000937722	0.00130877	0.0018405	0.00216006	0.0090172	0.0096198	0.0108733	0.010058	0.0100058	0.00793508	0.00755436	0.00597665	0.00447319	0.00401365	0.0032364	0.00286351	0.0022509	0.00211937	0.00199916	0.00168259	0.00166953	0.00155958	0.00151914	0.00146824	0.00142276	0.00142421	0.00136763	0.00137722
Bassoon	0.00117777	0.00116863	0.00112129	0.0011206	0.00111598	0.00107921	0.00103398	0.00102892	0.00103932	0.00100532	0.000952614	0.00102388	0.00108465	0.00104969	0.00124017	0.00141472	0.00164208	0.00205888	0.0024255	0.00313799	0.00354898	0.00449294	0.00659139	0.00735347	0.00809581	0.0116915	0.00969667	0.00864868	0.0069345	0.00552593	0.0043598	0.00370122	0.00312271	0.00242103	0.00203852	0.00191851	0.00174931	0.00154773	0.00160035	0.00153491	0.00133956	0.00133256	0.00133731	0.00128643	0.00124196	0.00122911	0.00123713	0.00121409	0.00119959
Synph	0.00165119	0.00162678	0.00156919	0.00157413	0.00153026	0.00151003	0.0014068	0.00137997	0.0013554	0.00132544	0.00125256	0.00127338	0.00126624	0.00117975	0.00129781	0.0013623	0.00146338	0.00155472	0.00193319	0.00219279	0.00224454	0.00279047	0.00340848	0.00377446	0.00450462	0.0099087	0.00979208	0.00999602	0.00937725	0.00867596	0.00696734	0.00646632	0.00549689	0.0042887	0.00387293	0.00333814	0.00299252	0.00251171	0.00238069	0.00226973	0.00201003	0.00193849	0.0018719	0.00183384	0.00172165	0.00174579	0.00171884	0.00168617	0.00165185
VGluT2	0.000322908	0.000322879	0.000325035	0.000340392	0.00033734	0.000335916	0.000329079	0.000321269	0.000359475	0.000352764	0.000338734	0.000362359	0.000356963	0.000337072	0.000362298	0.000386231	0.000391991	0.000399237	0.000506026	0.000476606	0.000478185	0.000578335	0.000810348	0.00101385	0.000788309	0.000884936	0.000773323	0.000639717	0.000738295	0.000665323	0.000553909	0.000541563	0.00055654	0.000506728	0.000446277	0.000486822	0.000443286	0.00040163	0.00038233	0.000399571	0.000363391	0.000368873	0.000365041	0.00034155	0.000334675	0.000337388	0.000328489	0.000314049	0.000322601
NR1	0.00141317	0.00141023	0.00138163	0.0013858	0.00138065	0.00137211	0.00126378	0.00126009	0.00130557	0.00121864	0.00121816	0.00128529	0.00130265	0.00131348	0.00142259	0.00183766	0.00214442	0.00292518	0.00424204	0.00617785	0.00864963	0.0131463	0.0200248	0.0236606	0.0263896	0.0139781	0.00873253	0.00658658	0.0050678	0.00368693	0.00276954	0.00260728	0.0021678	0.00186426	0.00170584	0.00173845	0.00162462	0.00150152	0.00164258	0.00157293	0.00148184	0.00151972	0.00155957	0.00153399	0.00146806	0.00149278	0.0015174	0.00146205	0.00143254
GluR2	0.000864564	0.000865287	0.000843848	0.000808453	0.000791288	0.000783803	0.000728278	0.000704368	0.000710378	0.000682335	0.000661871	0.000637308	0.000692171	0.00070834	0.000846206	0.00106694	0.0014395	0.00211775	0.00321627	0.00521262	0.0079665	0.0129619	0.019724	0.0253341	0.0306064	0.0171755	0.0108617	0.00746574	0.00514072	0.00349964	0.00235143	0.00202789	0.00168738	0.00136322	0.00118778	0.00123074	0.00112128	0.00100543	0.00104781	0.0010425	0.000935025	0.000974365	0.000985547	0.000954302	0.000937241	0.000928789	0.00093596	0.000911502	0.000921883
NR2A	0.000235843	0.00022445	0.000217727	0.00021757	0.000233386	0.000214385	0.000201567	0.000210982	0.000211881	0.000210742	0.000195562	0.000206417	0.000229984	0.000250972	0.000290725	0.000320694	0.000418344	0.000531036	0.00069986	0.0010193	0.00139877	0.00187597	0.00266496	0.00287054	0.00296554	0.00178925	0.00114492	0.000982805	0.000772931	0.000602894	0.000446701	0.0004486	0.000388225	0.000353174	0.000291484	0.000329962	0.000276882	0.000253482	0.00027387	0.000265536	0.000236974	0.000256664	0.000263145	0.000254288	0.000234501	0.00024536	0.000247256	0.000236503	0.000229602
NR2B	0.000606991	0.00060937	0.000610724	0.000601912	0.000598937	0.000619259	0.000558185	0.00057364	0.000570821	0.000555203	0.000567089	0.000575752	0.00060737	0.000591097	0.00069736	0.000861593	0.000974213	0.00134103	0.00185943	0.00260932	0.00364657	0.0050785	0.00750199	0.00815967	0.00948473	0.00573594	0.00375614	0.00302704	0.0022404	0.00168382	0.0011376	0.00119122	0.00103104	0.00082521	0.000702184	0.000788475	0.000732086	0.000677537	0.000719229	0.000720242	0.000664493	0.000671728	0.000698537	0.000680408	0.00064359	0.00063958	0.000660393	0.00063969	0.000628352
EAAT2	0.000919098	0.000920961	0.000958357	0.000954385	0.00101877	0.00100274	0.00104171	0.00112398	0.00116859	0.00119453	0.00117759	0.00124573	0.00128808	0.00125519	0.00127449	0.0013263	0.00128207	0.00117087	0.00112325	0.00121579	0.000959261	0.000956177	0.000833253	0.00100646	0.000434105	0.000840353	0.00069685	0.000712921	0.000893309	0.000935962	0.000893676	0.00107817	0.00111871	0.00108024	0.00114766	0.00116526	0.00105163	0.0011243	0.00115298	0.00109106	0.00106454	0.00109604	0.00107995	0.00101689	0.00101776	0.000997719	0.000986495	0.000966103	0.000967802
EAAT1	0.000535878	0.000574307	0.000547632	0.000584081	0.00063321	0.000669148	0.000593112	0.00058771	0.000679549	0.000766139	0.00074228	0.000740321	0.000745121	0.000736168	0.000736128	0.00079957	0.000789242	0.000754682	0.000721559	0.000668685	0.000804086	0.000517276	0.00112308	0.00111241	0.000813947	0.000756317	0.000566191	0.000588935	0.000545472	0.000688435	0.000542405	0.000670341	0.000696904	0.000651103	0.000771422	0.000742625	0.000671928	0.000689609	0.000695116	0.000722792	0.000730626	0.000699199	0.000628173	0.000616804	0.000609831	0.000582993	0.000614477	0.000595147	0.000561716
GlutSynth	0.000620689	0.000653857	0.000660261	0.000686259	0.000674732	0.000740208	0.00076673	0.000738742	0.000814298	0.000851818	0.000809918	0.00079193	0.000851017	0.000881813	0.000813037	0.000935989	0.000799956	0.000793525	0.00065461	0.000746843	0.000592485	0.000548626	0.000507197	0.000423774	5.42631e-05	0.000588247	0.000370202	0.00044945	0.000529661	0.000603347	0.000702543	0.000642215	0.000649221	0.000715227	0.00071458	0.00073055	0.000779278	0.00075297	0.000796401	0.000773635	0.000745577	0.000795575	0.000672272	0.00069182	0.000685956	0.000722486	0.000684809	0.000719955	0.000676625
	440	420	400	380	360	340	320	300	280	260	240	220	200	180	160	140	120	100	80	60	40	20	0	20	40	60	80	100	120	140	160	180	200	220	240	260	280	300	320	340	360	380	400	420	440	460	480	500	520
Normalized
EAAT2	0.693135	0.694541	0.722743	0.719747	0.768305	0.756211	0.785603	0.847648	0.881291	0.900853	0.888076	0.939466	0.971401	0.946602	0.961154	1.00023	0.966872	0.883006	0.847098	0.916886	0.723425	0.721099	0.628396	0.759023	0.327379	0.63375	0.525528	0.537648	0.673687	0.705854	0.673964	0.813101	0.843676	0.81466	0.865505	0.878776	0.793083	0.847887	0.869516	0.82282	0.802821	0.826577	0.814445	0.766887	0.767544	0.752428	0.743963	0.728584	0.729866
GluR2	0.0282482	0.0282718	0.0275713	0.0264149	0.025854	0.0256095	0.0237953	0.0230141	0.0232104	0.0222942	0.0216255	0.020823	0.0226155	0.0231438	0.0276484	0.0348605	0.0470332	0.0691938	0.105086	0.170314	0.260292	0.42351	0.64445	0.827748	1.00001	0.561181	0.354887	0.243931	0.167964	0.114345	0.0768291	0.0662579	0.0551324	0.0445409	0.0388088	0.0402125	0.0366359	0.0328508	0.0342354	0.0340618	0.0305504	0.0318358	0.0322011	0.0311802	0.0306228	0.0303466	0.0305809	0.0297818	0.030121
VGluT1	0.120861	0.11962	0.117952	0.11645	0.112803	0.110272	0.102223	0.0952927	0.0907642	0.0828831	0.0696843	0.0662296	0.0611875	0.0532487	0.0453826	0.0472506	0.0402396	0.0424782	0.0500332	0.062648	0.0776037	0.0862432	0.120368	0.169273	0.198663	0.829321	0.884742	1.00002	0.925046	0.92024	0.729797	0.694782	0.549678	0.411403	0.369139	0.297655	0.263359	0.207017	0.19492	0.183865	0.15475	0.153549	0.143436	0.139717	0.135035	0.130853	0.130986	0.125782	0.126664
[truncated: 1 more columns]

## Sheet: KDM L4VG2
Layer4 - VGluT2	500	480	460	440	420	400	380	360	340	320	300	280	260	240	220	200	180	160	140	120	100	80	60	40	20	20	40	60	80	100	120	140	160	180	200	220	240	260	280	300	320	340	360	380	400	420	440	460	480
VGluT1	0.000229377	0.000223843	0.000233424	0.000224562	0.000238277	0.000239997	0.000223885	0.00022806	0.000230812	0.000203082	0.000204646	0.000199782	0.000227884	0.000195652	0.000211808	0.000243283	0.000257453	0.00023087	0.000256127	0.000299011	0.000273216	0.000281101	0.000415799	0.000398978	0.000330855	0.000884112	0.000937249	0.00112284	0.000998046	0.00102095	0.000837446	0.000875956	0.000723547	0.00054047	0.000497052	0.000477844	0.000431366	0.000331367	0.000352818	0.000315915	0.000314957	0.000289069	0.000270168	0.000285498	0.000265019	0.000241404	0.000243844	0.000226719	0.000235477
Bassoon	0.00116694	0.00117141	0.0011156	0.00112749	0.00109937	0.00107822	0.00102224	0.000994279	0.00104241	0.00101452	0.000949833	0.000996355	0.00116912	0.00115682	0.0012472	0.00151134	0.00168433	0.00219326	0.00253459	0.00325797	0.0036277	0.00446389	0.00605507	0.00640264	0.00698689	0.00951425	0.00822436	0.00672038	0.00597977	0.0049161	0.00378889	0.00345338	0.00302048	0.00242106	0.00199986	0.00201532	0.00183741	0.0016283	0.00167452	0.00159042	0.00142857	0.00136063	0.00138602	0.00131359	0.00130136	0.00128083	0.00127388	0.00124675	0.001218
Synph	0.00163223	0.00162466	0.00155971	0.0015592	0.00148391	0.00151503	0.00141458	0.00138014	0.00142154	0.00136234	0.00126396	0.00128039	0.00137905	0.00133157	0.00138315	0.00148008	0.00167025	0.00178526	0.00209704	0.00242946	0.00240835	0.00277728	0.0037292	0.0036288	0.00412596	0.00851963	0.00832589	0.00827124	0.00757608	0.00733531	0.00592141	0.00572986	0.00518059	0.00414331	0.00369585	0.00337883	0.00303739	0.00259861	0.00249709	0.00241347	0.00213999	0.00206381	0.00200544	0.00192614	0.00185632	0.00178608	0.00177506	0.00175075	0.00171516
VGluT2	0.000789525	0.000810009	0.000746472	0.000772191	0.000702865	0.000700878	0.000721326	0.000662591	0.000653274	0.000601676	0.000582216	0.000543814	0.000498583	0.000434993	0.000472873	0.000500157	0.000484166	0.000549311	0.000733698	0.000828509	0.00113334	0.00144486	0.002066	0.00243186	0.00309447	0.00542523	0.00498304	0.00490271	0.00504127	0.00423362	0.00373331	0.00365346	0.00335068	0.00279169	0.00252894	0.00237406	0.0021554	0.00184762	0.00173373	0.00167617	0.00144323	0.00141112	0.00133632	0.00126157	0.00122093	0.00115946	0.00114465	0.00107205	0.00104794
NR1	0.00138302	0.00139246	0.00134394	0.00135205	0.00135813	0.00133061	0.00125584	0.00123255	0.00129572	0.00119222	0.00120984	0.00125103	0.00133209	0.00130973	0.00146788	0.00172744	0.00218003	0.00293165	0.00389527	0.00561579	0.0079182	0.0115982	0.0167749	0.0216778	0.0216808	0.0123474	0.00776355	0.00595885	0.00459328	0.00346791	0.00257719	0.00248664	0.00216406	0.00183105	0.0017523	0.00172948	0.00163563	0.00149934	0.00159689	0.00155542	0.00148934	0.00147517	0.00151062	0.00148011	0.00141739	0.00143878	0.00148851	0.00145109	0.00145807
GluR2	0.000879653	0.000876118	0.000821458	0.000797922	0.0007869	0.00079008	0.000738603	0.000720293	0.000741183	0.000694755	0.000696669	0.000697002	0.000764448	0.000798754	0.00101077	0.00118787	0.00152935	0.00232462	0.00319625	0.00540088	0.00709856	0.0114858	0.0162032	0.0228937	0.0254564	0.0145577	0.00973958	0.00656474	0.0048995	0.00331809	0.0024827	0.00211339	0.00167205	0.00150642	0.00127564	0.00129639	0.00115079	0.00107655	0.00109179	0.00111088	0.000963819	0.00103157	0.00102031	0.0009973	0.000954129	0.000966962	0.000953249	0.000939414	0.000931703
NR2A	0.000217435	0.00022825	0.000211895	0.0002308	0.000226842	0.00022513	0.000204448	0.000213144	0.000224563	0.000215998	0.000192828	0.000206164	0.000253435	0.000259286	0.000318204	0.000323471	0.000397067	0.000475672	0.000688342	0.000959326	0.00134078	0.00167536	0.00224791	0.00279284	0.00243276	0.0016979	0.00123404	0.000917174	0.000768382	0.000560414	0.000418723	0.000458994	0.000398608	0.000344096	0.000282504	0.000338533	0.000290905	0.000271118	0.000280164	0.000254309	0.00024882	0.000271109	0.000251124	0.000257098	0.000254929	0.000247462	0.000259776	0.000243713	0.000235277
NR2B	0.000613549	0.000617249	0.000589243	0.000597532	0.000587715	0.000602826	0.000558992	0.000557393	0.000544951	0.000579408	0.000559201	0.000580196	0.00060562	0.000537568	0.000647245	0.000849451	0.000899166	0.00118221	0.00162481	0.00218029	0.00294972	0.00415468	0.00649686	0.0070676	0.00745398	0.00476215	0.00294452	0.00239021	0.00178344	0.00160356	0.00103013	0.0010424	0.000939295	0.000770457	0.000687329	0.000743473	0.00069589	0.000627853	0.000701655	0.000702307	0.000633489	0.000637783	0.000686233	0.000669949	0.000649639	0.000625272	0.000648776	0.000612598	0.000626204
[truncated: 1 more columns]

## Sheet: KDM L4Inh
Layer4 - Inhibitory	500	480	460	440	420	400	380	360	340	320	300	280	260	240	220	200	180	160	140	120	100	80	60	40	20	20	40	60	80	100	120	140	160	180	200	220	240	260	280	300	320	340	360	380	400	420	440	460	480
VGluT1	0.00125546	0.00127839	0.00124085	0.00125205	0.00125783	0.00130908	0.00122159	0.0012466	0.00131266	0.00123307	0.0012338	0.00122418	0.00127087	0.00113655	0.00117674	0.00118676	0.00103444	0.000982032	0.00106715	0.00112158	0.000859808	0.000958465	0.00112891	0.00105891	0.00103155	0.00110893	0.000921842	0.000978031	0.00104268	0.00108391	0.00100834	0.00115848	0.00114368	0.0011291	0.00114528	0.00122072	0.00115517	0.00114733	0.00124401	0.00125334	0.00121036	0.0012203	0.00130412	0.00126599	0.00121185	0.00126135	0.00126689	0.00126002	0.00122996
Bassoon	0.00112654	0.00112361	0.0011281	0.00110359	0.00113549	0.00114538	0.00110781	0.00110677	0.00117812	0.00113051	0.00107511	0.00112877	0.0012581	0.00111176	0.00120433	0.00145079	0.00146512	0.00159448	0.00178912	0.00225734	0.00209803	0.00259817	0.00347958	0.00379112	0.00402791	0.00464301	0.00339514	0.00292761	0.00284572	0.00212385	0.00169873	0.00173733	0.00154577	0.00139436	0.00124657	0.00134182	0.00118951	0.00119062	0.00123773	0.00122145	0.00120239	0.00121545	0.00121851	0.00119507	0.00116568	0.00120292	0.00119839	0.00118818	0.00118652
Synph	0.00152819	0.00153159	0.00148033	0.0015023	0.00152174	0.00153584	0.00147814	0.00143668	0.0015666	0.00149292	0.00152499	0.00150092	0.00157006	0.00154434	0.00167496	0.00168671	0.00173211	0.00177755	0.00196526	0.00227582	0.00236075	0.00246889	0.00321934	0.00349516	0.00368143	0.00502309	0.00405563	0.00348426	0.00329161	0.00273919	0.00229246	0.00245571	0.00222985	0.00199082	0.00186013	0.00189815	0.00183265	0.00166067	0.00176892	0.00179433	0.0016076	0.0016702	0.00167129	0.00167563	0.00155534	0.00164561	0.00166209	0.00160709	0.00160296
VGluT2	0.000864306	0.000896749	0.000855695	0.00084772	0.000875799	0.00090096	0.000838845	0.000808404	0.000888312	0.000828372	0.000794661	0.000826238	0.000881836	0.000783132	0.000801543	0.000856281	0.000809776	0.000747128	0.00086159	0.000890115	0.000746457	0.000771073	0.000944308	0.00104853	0.000627437	0.000900321	0.000708452	0.000698593	0.000858315	0.000811036	0.000676276	0.00083326	0.000789287	0.000812507	0.000765467	0.000885468	0.000825564	0.000789819	0.000847831	0.000866347	0.000813225	0.000812547	0.00086124	0.000835553	0.000817794	0.000858142	0.000845881	0.000850207	0.000857945
GAD	0.000413846	0.000431377	0.000407494	0.000407195	0.000420974	0.000418292	0.000399707	0.000423083	0.000434841	0.000440046	0.000458189	0.000473002	0.000525575	0.000561516	0.000645283	0.000762196	0.000884584	0.000967024	0.00107268	0.00135394	0.00138868	0.00143045	0.00206269	0.00236769	0.00196343	0.00289163	0.00272886	0.00284926	0.00265643	0.00232347	0.00206294	0.0018371	0.0016375	0.00145473	0.00118031	0.00113461	0.000986936	0.000872676	0.000844592	0.000830629	0.000738828	0.000712677	0.000723825	0.000685909	0.000653837	0.00063175	0.000624721	0.000599085	0.000605803
Synapsin	0.00110431	0.00113445	0.00108647	0.00108393	0.00109051	0.00111991	0.00107336	0.00105494	0.00111569	0.0010641	0.00108203	0.00108663	0.00110135	0.00109696	0.0012058	0.00121891	0.00124279	0.00122834	0.00146652	0.00170051	0.00152379	0.00203099	0.00227474	0.00195898	0.0021078	0.00429273	0.00388761	0.00372342	0.0032811	0.00266716	0.00212616	0.00189198	0.00165312	0.00147245	0.0014194	0.00129792	0.00132967	0.00123453	0.00127759	0.0012708	0.00118117	0.00117322	0.00120438	0.00122656	0.00118813	0.00121207	0.00119889	0.0011891	0.00115016
GABRA	0.000737602	0.000735939	0.000737114	0.000720882	0.000747259	0.000731026	0.000700356	0.000713971	0.000741424	0.000728785	0.000762725	0.000780762	0.00080834	0.000844035	0.000888635	0.00103945	0.00112212	0.0013686	0.00181089	0.00248145	0.00312264	0.00439562	0.00697844	0.00949895	0.00916747	0.00483678	0.00291426	0.00224725	0.00190346	0.00130683	0.00118196	0.00114866	0.00107736	0.000960634	0.000880734	0.000936492	0.000861586	0.000840137	0.000883721	0.000868651	0.000846231	0.000829069	0.000863178	0.000833824	0.000790108	0.00082863	0.000844342	0.000795705	0.000781666
[truncated: 1 more columns]
