# Supplementary material for: Sub-synaptic, multiplexed analysis of proteins reveals Fragile X related protein 2 is mislocalized in Fmr1 KO synapses
Source: eLife. 2016 Oct 22;5:e20560. doi: 10.7554/eLife.20560 (PMC5098911; doi:10.7554/eLife.20560)
Supplement: Figure 6—source data 1. — Source data for the 1D histograms of protein distribution at light level. DOI: http://dx.doi.org/10.7554/eLife.20560.014 [file elife-20560-fig6-data1.xlsx]

## Sheet: Rotations
	500	480	460	440	420	400	380	360	340	320	300	280	260	240	220	200	180	160	140	120	100	80	60	40	20	20	40	60	80	100	120	140	160	180	200	220	240	260	280	300	320	340	360	380	400	420	440	460	480
L5 VG1 KO FMRP	9.48895e-05	9.66365e-05	0.000101218	0.000103234	0.000101176	9.87926e-05	0.000106839	0.000123934	0.000111133	0.000114334	0.000108373	0.000129333	0.000132554	0.00012357	0.000135871	0.000139305	0.000179872	0.000202103	0.000221617	0.00033798	0.000277045	0.000197457	0.000573758	0.000343572	0.000620616	0.000232521	0.000255104	0.000213472	0.000166059	0.000172442	0.000185772	0.000164546	0.000147487	0.000157602	0.000149488	0.000151256	0.000119382	0.000130813	0.000129423	0.000138569	0.000121639	0.000118046	0.000125254	0.000113873	0.000112111	0.000102566	0.00011423	0.000109633	0.000108925
L5 VG1 KO FXR1	0.000187003	0.000182373	0.000197663	0.000201715	0.000207039	0.000219483	0.000228133	0.000237471	0.000242354	0.000256781	0.000269918	0.000293138	0.000328666	0.000367964	0.000479249	0.000589033	0.000761703	0.00118801	0.00181522	0.0027744	0.00421066	0.0077523	0.0237603	0.0226244	0.0114454	0.0030078	0.00209419	0.00164762	0.00103524	0.000731989	0.000562407	0.000464498	0.000410332	0.000342115	0.000290524	0.000325233	0.00028403	0.000260929	0.000262933	0.000254534	0.000242071	0.000242142	0.000263038	0.000240621	0.000237658	0.000235791	0.000237356	0.00022989	0.000214027
L5 VG1 KO FXR2	0.000115685	0.000115312	0.000115798	0.000116123	0.000111257	0.000123214	0.000131624	0.00013235	0.000126642	0.00013585	0.000143026	0.000160189	0.000171335	0.000144743	0.000146102	0.000188663	0.00020699	0.000198326	0.000262428	0.000307833	0.000306347	0.000332156	0.000701426	0.000353432	0.0003787	0.000369757	0.000237758	0.000238246	0.00027026	0.000238871	0.000193562	0.000169858	0.000190244	0.000187399	0.000195318	0.000180887	0.00015897	0.00016732	0.00015175	0.000166636	0.000149976	0.000152014	0.000154222	0.000143378	0.000131131	0.000133693	0.000123444	0.000130235	0.000123857
L5 VG1 WT FMRP	0.000201304	0.000201627	0.000193243	0.000186926	0.000168573	0.000218024	0.000184638	0.000191105	0.00016266	0.000202879	0.000202116	0.000196217	0.000243392	0.000210327	0.000241045	0.000245259	0.000234481	0.000251822	0.000285136	0.000265291	0.000330413	0.000533546	0.0012152	0.000937175	0.000440953	0.000354632	0.000335564	0.000330962	0.000267793	0.000201224	0.000195073	0.000278228	0.000237441	0.000223609	0.000189754	0.000205891	0.000205197	0.000212268	0.000225613	0.000226096	0.000220088	0.000233213	0.000206622	0.000191162	0.000209737	0.00021016	0.000203251	0.000207308	0.000183128
L5 VG1 WT FXR1	0.000200401	0.00020347	0.000223543	0.000200363	0.000216215	0.000244659	0.000214906	0.000245818	0.000264931	0.00025118	0.00026288	0.000314872	0.00036981	0.000425326	0.000454367	0.000571234	0.000687091	0.00113363	0.00164759	0.0024755	0.00406274	0.0065971	0.0134826	0.0187205	0.00810828	0.00280981	0.00210498	0.00144606	0.000995156	0.000815903	0.000595649	0.000497154	0.000454192	0.000352567	0.000285835	0.000354103	0.000337336	0.000285791	0.000310855	0.000303789	0.000276227	0.000260508	0.000285598	0.000240467	0.000232852	0.000267273	0.000255602	0.000231083	0.000229453
L5 VG1 WT FXR2	0.000332764	0.00034053	0.000325377	0.000321064	0.000334457	0.000356422	0.000382705	0.000392325	0.00041824	0.000429353	0.000425456	0.000436072	0.00047227	0.000515738	0.000603743	0.000623821	0.000762415	0.000852801	0.000994275	0.00120221	0.00137009	0.00208061	0.00414014	0.00433139	0.00264728	0.0014813	0.00105425	0.000992375	0.000842417	0.000745128	0.000680449	0.000619589	0.000637598	0.000591215	0.000520322	0.00052012	0.000467777	0.000422086	0.000442251	0.000448384	0.000421168	0.000438466	0.000438862	0.000423016	0.000423358	0.000397447	0.000416207	0.000375201	0.000389172
L5 VG2 KO FMRP	0.000121408	0.000121113	0.000155073	0.000162679	0.000114031	9.93432e-05	0.000151566	0.000129171	0.000122756	0.000217201	0.000171162	0.000160643	0.000332898	0.000167484	0.000189561	0.000193745	0.000201463	0.000112762	0.000204445	0.000163273	0.000538742	0.000192837	0.000364247	0	0.000405232	0.000273491	0.000350527	0.000242982	0.000117459	5.32838e-05	7.59471e-05	0.000256637	0.00013876	0.000220731	0.000180706	0.000187841	0.000144002	0.000185168	0.000175248	0.000167437	0.000206826	0.000146219	0.000120466	0.000183783	0.000153024	0.000170922	0.00014034	0.000165814	0.000184993
L5 VG2 KO FXR1	0.000320109	0.00024264	0.000296788	0.000277926	0.000270054	0.000326958	0.000240868	0.000395932	0.00033549	0.000309188	0.000393726	0.000454749	0.000334892	0.000421537	0.000487957	0.000859608	0.00137428	0.0019297	0.00194675	0.0042867	0.00697748	0.0122795	0.0285889	0.0363919	0.0280734	0.00471652	0.00212014	0.00211887	0.00173334	0.00169607	0.000989956	0.000704705	0.000650347	0.000583696	0.000418773	0.000435898	0.000381539	0.00034091	0.000452543	0.000404029	0.000415791	0.000406484	0.000416535	0.000372637	0.000352812	0.000379782	0.000325454	0.000321486	0.000295341
L5 VG2 KO FXR2	0.000196135	0.00014931	0.000137117	0.000150077	0.000204557	0.000175386	0.000197048	0.000157403	0.000220021	0.000174427	0.000229999	0.000185299	0.000195784	0.000142137	0.00020421	0.000281539	0.000337046	0.000214395	0.000440124	0.000400557	0.000321325	0.000394682	0.0058041	0.00109693	0.000405232	0.000936612	0.000529773	0.000401733	0.000186694	0.000186685	0.000307357	0.000442725	0.000340209	0.000355745	0.000329615	0.000163405	0.000312715	0.000250765	0.000239701	0.000232058	0.000195993	0.000181046	0.000202705	0.000219448	0.000223184	0.000204249	0.000191416	0.000196246	0.000158496
L5 VG2 WT FMRP	0.000206462	0.000171954	0.000210021	0.000179409	0.000251189	0.000194123	0.000173582	0.000201975	0.000215657	0.000179983	0.000188586	0.000250923	0.00017064	0.00016805	0.00025743	0.000229279	0.000352313	0.000263031	0.000550851	0.000367565	0.000210896	0.000211905	0.000586852	0.000622663	0.000799187	0	0.000369064	0.000336848	0.000375892	0.000246642	0.000255052	0.00022832	0.000159373	0.000194887	0.000164992	0.000221845	0.000166776	0.000275648	0.000202022	0.00020388	0.000183886	0.000166933	0.000211803	0.000214529	0.000219997	0.000192416	0.00013341	0.000209942	0.000196333
L5 VG2 WT FXR1	0.000296981	0.000314606	0.000295573	0.000278874	0.000241243	0.00029902	0.000363588	0.000315696	0.000311346	0.000329025	0.000358905	0.000472363	0.000547078	0.000517189	0.000704003	0.00101212	0.00124706	0.00169849	0.0022778	0.00342477	0.00532576	0.00780668	0.0170789	0.032473	0.0125079	0.00371826	0.00352797	0.00193432	0.00165374	0.00141417	0.00114008	0.000899004	0.000602501	0.000526363	0.000384269	0.000474015	0.000388316	0.000349922	0.000423296	0.000414836	0.000397542	0.000308547	0.000337873	0.000327048	0.00039582	0.000373686	0.000378041	0.000340682	0.00038187
L5 VG2 WT FXR2	0.000393224	0.000394901	0.000418001	0.000392817	0.000445855	0.000434248	0.000421697	0.000512483	0.000428513	0.000424713	0.000419479	0.00051525	0.00056992	0.000546476	0.000639115	0.000850699	0.00107671	0.00102044	0.000985937	0.00115908	0.00148176	0.00366227	0.00561941	0.00251665	0.00323693	0.00221699	0.000758817	0.00140212	0.00100628	0.000902741	0.000707507	0.000906257	0.000673487	0.0006781	0.000528157	0.000563252	0.000584976	0.000545898	0.00054945	0.000552241	0.000564987	0.000575519	0.000586121	0.000550799	0.000591453	0.000565562	0.000490528	0.000448512	0.000437233
L4 VG1 KO FMRP	9.59466e-05	0.000100739	0.000107641	9.97995e-05	9.60978e-05	9.53856e-05	0.000101219	0.00012421	0.000125611	0.00011043	0.000109927	0.000125605	0.000124766	0.00012489	0.000140808	0.000122945	0.000185279	0.000191526	0.000201216	0.000197839	0.000178648	0.000299596	0.000293829	0.000811792	0.000380232	0.000266172	0.000185705	0.000232514	0.00023494	0.000186688	0.000150414	0.000142271	0.000124697	0.0001281	0.000142393	0.000130147	0.000129994	0.000127917	0.000121018	0.000108919	0.000127067	0.000103998	0.000110363	0.000115703	0.000119528	0.000113111	0.000109982	0.000102408	0.000107482
L4 VG1 KO FXR1	0.000208175	0.000235558	0.000255173	0.000245062	0.000253388	0.000260393	0.000253624	0.000264261	0.000307683	0.000266833	0.000311349	0.000320753	0.000341312	0.000382101	0.000461678	0.000552974	0.000751003	0.00113049	0.00185234	0.00289853	0.00470395	0.00918073	0.0200698	0.0256614	0.0125864	0.00281838	0.00222592	0.00141933	0.000951387	0.000748245	0.000563124	0.000468576	0.000462423	0.000340397	0.000344929	0.000347418	0.000329515	0.000288384	0.000316322	0.000305474	0.000276051	0.000299597	0.000315348	0.000297	0.000284221	0.000270204	0.000271135	0.000252169	0.00026311
L4 VG1 KO FXR2	0.000124938	0.000126325	0.000138466	0.000136077	0.000141964	0.000157198	0.000163688	0.000151063	0.000145417	0.000164139	0.000160147	0.000173173	0.000217331	0.000182268	0.0002099	0.00025327	0.00021842	0.000225942	0.000303544	0.000447318	0.000463288	0.000446377	0.00116789	0.00154551	0.000975982	0.000393075	0.000279248	0.000299712	0.000294365	0.000250866	0.000229159	0.000234675	0.000238357	0.000222014	0.000191041	0.000195949	0.000188297	0.000198501	0.000174841	0.000154758	0.000160622	0.000167692	0.000151442	0.000153033	0.000153628	0.000155297	0.000143137	0.00013468	0.000158724
L4 VG1 WT FMRP	0.000214139	0.000211152	0.000208888	0.000206665	0.000217985	0.000212663	0.000199612	0.000222494	0.000215085	0.000206871	0.000219415	0.000215799	0.000211874	0.000225713	0.000211442	0.000249078	0.000274332	0.000288344	0.000289971	0.000267939	0.000302072	0.0005172	0.000731713	0.00068896	0.00017307	0.000550601	0.000333727	0.000299441	0.000238854	0.00023809	0.000270356	0.000291107	0.000262022	0.000229334	0.000216224	0.000250356	0.000236708	0.000217082	0.000240643	0.000232387	0.000241436	0.000232128	0.000239801	0.000229272	0.000221915	0.000224513	0.000224826	0.000218731	0.000216861
L4 VG1 WT FXR1	0.000251835	0.000269899	0.000266668	0.000268631	0.000263065	0.000280184	0.000273412	0.000282694	0.000293872	0.000283651	0.000335226	0.000341284	0.000395027	0.000412101	0.000473189	0.000665011	0.00086275	0.00127371	0.00197095	0.00335939	0.00560682	0.00821113	0.0228487	0.0278069	0.0118975	0.00343258	0.00304268	0.00187188	0.0014622	0.00100084	0.000730443	0.000534146	0.000472277	0.000453823	0.000392541	0.000400323	0.000359493	0.000322159	0.000325159	0.000319596	0.000316465	0.000321012	0.000336268	0.000333703	0.000305646	0.000313502	0.000306102	0.000301731	0.000297633
L4 VG1 WT FXR2	0.000278772	0.000289689	0.000296413	0.000279113	0.000287023	0.000310702	0.000288524	0.000293284	0.000342915	0.000352043	0.000396817	0.000376299	0.000440507	0.000480721	0.000520538	0.000618984	0.000688744	0.000719701	0.000943323	0.00111343	0.00122401	0.00187982	0.00252095	0.00362461	0.002028	0.00113043	0.00112788	0.00096845	0.000795145	0.000621658	0.000533506	0.000536317	0.000545255	0.000468257	0.000448587	0.000413921	0.000410952	0.000372838	0.000338763	0.000343064	0.000341427	0.000345101	0.000340278	0.000351535	0.000352366	0.00034691	0.000341176	0.00033401	0.000329111
L4 VG2 KO FMRP	0.000114956	0.000103721	0.000108795	0.000115418	0.000100437	9.81834e-05	0.000131532	0.000104336	0.000108253	9.78621e-05	0.000119551	0.0001322	0.000112129	0.000170927	0.000112104	0.00012703	0.000185981	0.000147601	0.000177975	0.0003436	0.000117065	0.000259507	0.000637113	0.000188914	0.000809059	0.000296628	0.000285631	0.000103555	8.93891e-05	0.000184298	0.000136336	0.000144109	0.00014625	0.000140918	0.000113994	0.000136448	0.000110682	0.000125795	0.000135566	0.000134332	0.000148408	0.000117778	0.000118456	9.47028e-05	0.000115404	0.000131739	0.000113136	0.000104216	9.98884e-05
L4 VG2 KO FXR1	0.000204609	0.000222011	0.000221199	0.000192237	0.000211417	0.000255822	0.000282186	0.000256329	0.000276296	0.000296403	0.000301069	0.000215745	0.000190587	0.000379359	0.000443287	0.000546365	0.000607163	0.00101071	0.00156043	0.00277924	0.00538357	0.00812961	0.0200309	0.0219819	0.00813244	0.00261791	0.00217004	0.00126237	0.00100772	0.000586668	0.000430175	0.000466872	0.000366565	0.000327968	0.000289362	0.000291398	0.000307777	0.000260217	0.000272389	0.000328586	0.00025847	0.000265549	0.000246912	0.000221782	0.000242895	0.00025977	0.000282464	0.000217287	0.000225423
L4 VG2 KO FXR2	0.000120303	0.000111292	0.000146336	0.000150889	0.000144053	0.000156117	0.000147337	0.000147049	0.000139195	0.000115963	0.000149248	0.000216299	0.000141526	0.000232551	0.000178967	0.000210686	0.000211724	0.000169367	0.00026408	0.000367963	0.000266605	0.000238607	0.000254316	0.00207542	0.000948666	8.65002e-05	0.000101432	0.00023595	0.000312511	0.000163613	0.000207433	0.000207521	0.000201488	0.000165947	0.000143949	0.000191038	0.000156488	0.000178732	0.000232979	0.000192169	0.00016143	0.000160826	0.000147903	0.000183773	0.000199595	0.000145065	0.000142463	0.000140438	0.000130763
L4 VG2 WT FMRP	0.00021534	0.000209563	0.000231468	0.000217185	0.000214203	0.000221543	0.000222477	0.000217051	0.000234849	0.000219873	0.000242837	0.000200099	0.000219083	0.000211025	0.000315478	0.000296862	0.000223308	0.00034997	0.000333993	0.0002616	0.000354038	0.000226572	9.3549e-05	0.00175949	0.00013801	0.000926324	0.000229249	0.000281163	0.000224711	0.000133846	0.000239151	0.000189405	0.000272076	0.000289464	0.000258634	0.000223829	0.000214438	0.000186247	0.000247926	0.00022139	0.000223165	0.000211184	0.000216025	0.000226429	0.000197283	0.000213143	0.000225841	0.000239898	0.000233032
L4 VG2 WT FXR1	0.000265144	0.000252699	0.000245193	0.000235002	0.000264461	0.000264063	0.000314574	0.000317483	0.000264151	0.000218142	0.000290873	0.000285011	0.000287451	0.000424543	0.000584132	0.000613555	0.000968147	0.00133891	0.00172655	0.00262621	0.0039945	0.00789107	0.018622	0.0222662	0.0119936	0.0035878	0.00242614	0.00228779	0.0011629	0.00104548	0.000719778	0.000483563	0.000458914	0.000334466	0.000352351	0.000273472	0.000316373	0.000401308	0.000319137	0.000313457	0.00029058	0.000347251	0.000321057	0.000300209	0.000264053	0.000276142	0.000282105	0.000312172	0.000292652
L4 VG2 WT FXR2	0.000256705	0.000252146	0.000297761	0.00026287	0.000274047	0.00029472	0.00025278	0.000309568	0.000290976	0.000235881	0.000330822	0.000339253	0.00039772	0.000455754	0.000484584	0.000585632	0.000548766	0.000764346	0.000908736	0.00102797	0.0014446	0.00223309	0.00480588	0.00105991	0.000412166	0.000620418	0.000340447	0.000447755	0.000588804	0.0006484	0.000641162	0.000574064	0.000328068	0.000404237	0.00036642	0.0003677	0.000302437	0.000344466	0.00031267	0.000363998	0.000319651	0.000368402	0.000336215	0.000298516	0.000318915	0.000317315	0.000332693	0.000336314	0.0003253
	Layer 4 VG1
	Layer 4 VG2
[truncated: 2 more columns]
