# Supplementary material for: Sub-synaptic, multiplexed analysis of proteins reveals Fragile X related protein 2 is mislocalized in Fmr1 KO synapses
Source: eLife. 2016 Oct 22;5:e20560. doi: 10.7554/eLife.20560 (PMC5098911; doi:10.7554/eLife.20560)
Supplement: Figure 6—source data 2. — Source data for the 1D histograms of protein distribution at EM level. DOI: http://dx.doi.org/10.7554/eLife.20560.015 [file elife-20560-fig6-data2.xlsx]

## Sheet: FMRP Layer 4
Bin	Frequency
-500	0
-475	0
-450	0
-425	0
-400	0
-375	0
-350	0
-325	1
-300	0
-275	0
-250	0
-225	0
-200	0
-175	0
-150	0
-125	0																425
-100	3																400
-75	4																375
-50	6																350
-25	5																325
0	4																300
25	0																275
50	2																250
75	3																225
100	4																200
125	3																175
150	0																150
175	0																125
200	0																100
225	0																75
250	0																50
275	0																25
300	0																0
325	0																25
350	0																50
375	0																75
400	0																100
425	0																125
450	0																150
475	0																175
500	0																200
More	0																225
																	250
																	275
																	300
																	325
																	350
																	375
																	400
																	425

## Sheet: FMRP Layer5
Bin	Frequency
-500	0
-475	0
-450	0
-425	0
-400	0
-375	0
-350	0
-325	0
-300	0
-275	0
-250	0
-225	0
-200	1
-175	0
-150	1
-125	2
-100	9
-75	20
-50	15
-25	7
0	4
25	2
50	1
75	1
100	3
125	0
150	2
175	0
200	1
225	0
250	0
275	0
300	0
325	0
350	0
375	0
400	0
425	0
450	0
475	0
500	0
More	0
