# Supplementary material for: Sub-synaptic, multiplexed analysis of proteins reveals Fragile X related protein 2 is mislocalized in Fmr1 KO synapses
Source: eLife. 2016 Oct 22;5:e20560. doi: 10.7554/eLife.20560 (PMC5098911; doi:10.7554/eLife.20560)
Supplement: Figure 7—source data 2. — Source data for the 1D histograms of protein distribution at EM level. DOI: http://dx.doi.org/10.7554/eLife.20560.018 [file elife-20560-fig7-data2.xlsx]

## Sheet: FXR2 Layer4
Bin	Frequency																425
-500	0																400
-475	0																375
-450	0																350
-425	0																325
-400	0																300
-375	0																275
-350	0																250
-325	0																225
-300	0																200
-275	0																175
-250	0																150
-225	0																125
-200	2																100
-175	1																75
-150	4																50
-125	2																25
-100	1																0
-75	5																25
-50	1																50
-25	0																75
0	0																100
25	0																125
50	0																150
75	0																175
100	0																200
125	0																225
150	1																250
175	1																275
200	1																300
225	0																325
250	0																350
275	1																375
300	0																400
325	0																425
350	0
375	0
400	0
425	1
450	0
475	0
500	0
More	0

## Sheet: FXR2 Layer5
Bin	Frequency
-500	0
-475	0
-450	0
-425	0
-400	0
-375	1
-350	0
-325	0
-300	1
-275	0
-250	1
-225	1
-200	0
-175	1
-150	1
-125	5
-100	4
-75	2
-50	4
-25	4
0	2
25	0
50	0
75	0
100	1
125	1
150	0
175	1
200	1
225	0
250	0
275	2
300	0
325	0
350	0
375	0
400	0
425	0
450	0
475	0
500	0
More	0

## Sheet: FXR2 Layer4 KO
Bin	Frequency
-500	0
-475	0
-450	0
-425	1
-400	0
-375	0
-350	0
-325	0
-300	0
-275	0
-250	0
-225	0
-200	2
-175	0
-150	0
-125	0
-100	1
-75	0
-50	1
-25	0
0	0
25	0
50	0
75	2
100	1
125	0
150	0
175	0
200	0
225	0
250	0
275	1
300	0
325	0
350	0
375	0
400	0
425	0
450	0
475	0
500	0
More	0

## Sheet: FXR2 Layer5 KO
Bin	Frequency
-500	0
-475	0
-450	0
-425	0
-400	0
-375	0
-350	0
-325	0
-300	0
-275	0
-250	0
-225	0
-200	0
-175	0
-150	1
-125	1
-100	1
-75	1
-50	0
-25	1
0	0
25	0
50	0
75	0
100	1
125	1
150	0
175	0
200	0
225	0
250	0
275	0
300	0
325	0
350	0
375	0
400	0
425	1
450	0
475	0
500	0
More	0
