# Supplementary material for: Sub-synaptic, multiplexed analysis of proteins reveals Fragile X related protein 2 is mislocalized in Fmr1 KO synapses
Source: eLife journal article supplement (doi:10.7554/elife.20560), 2016-10-22

**a****Layer 5 (*Fmr1* WT) FXR1P****VGluT1**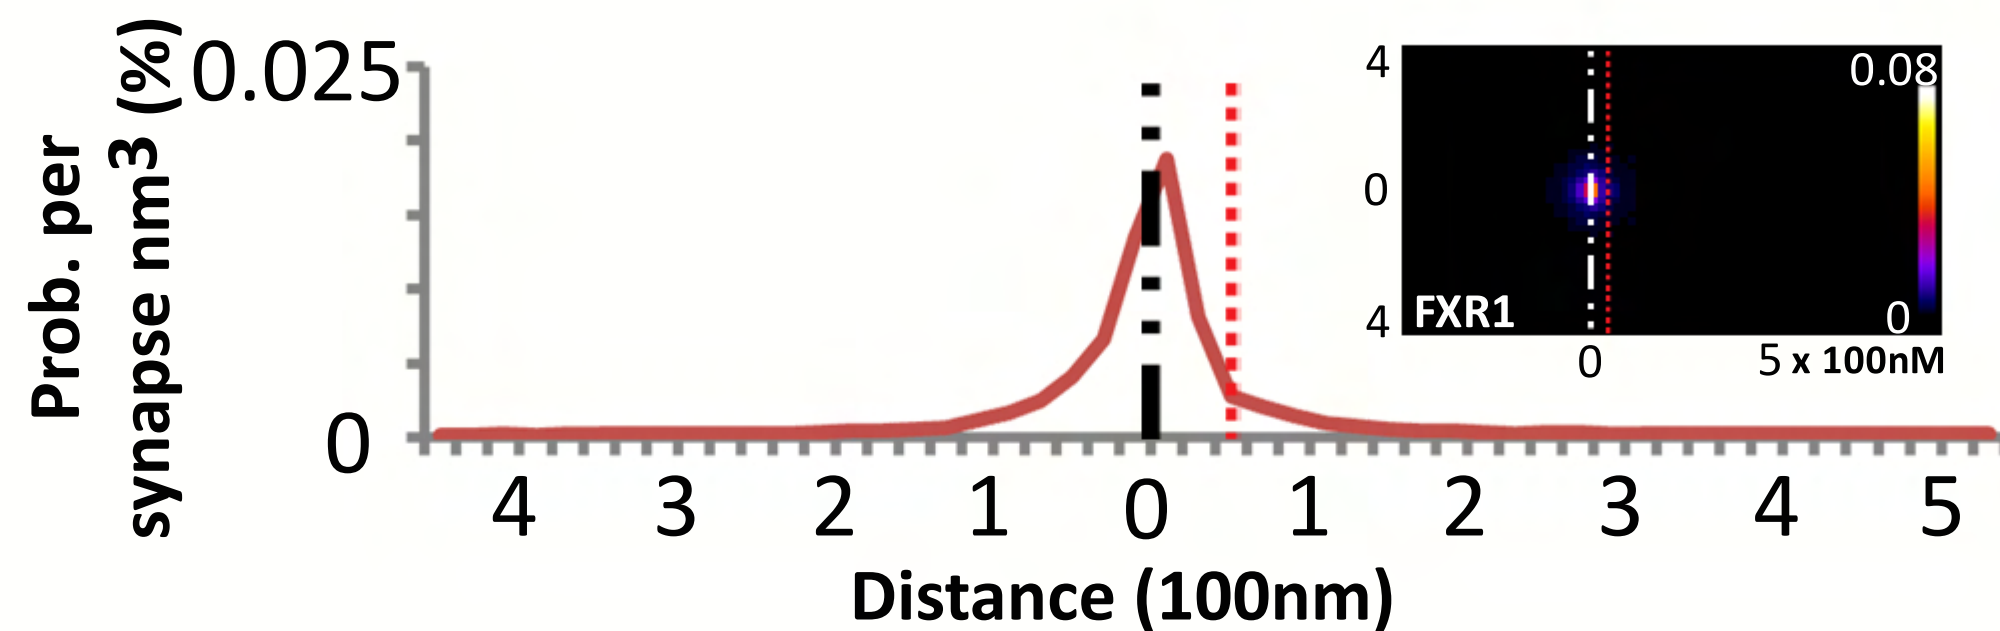**Layer 5 (*Fmr1* KO) FXR1P**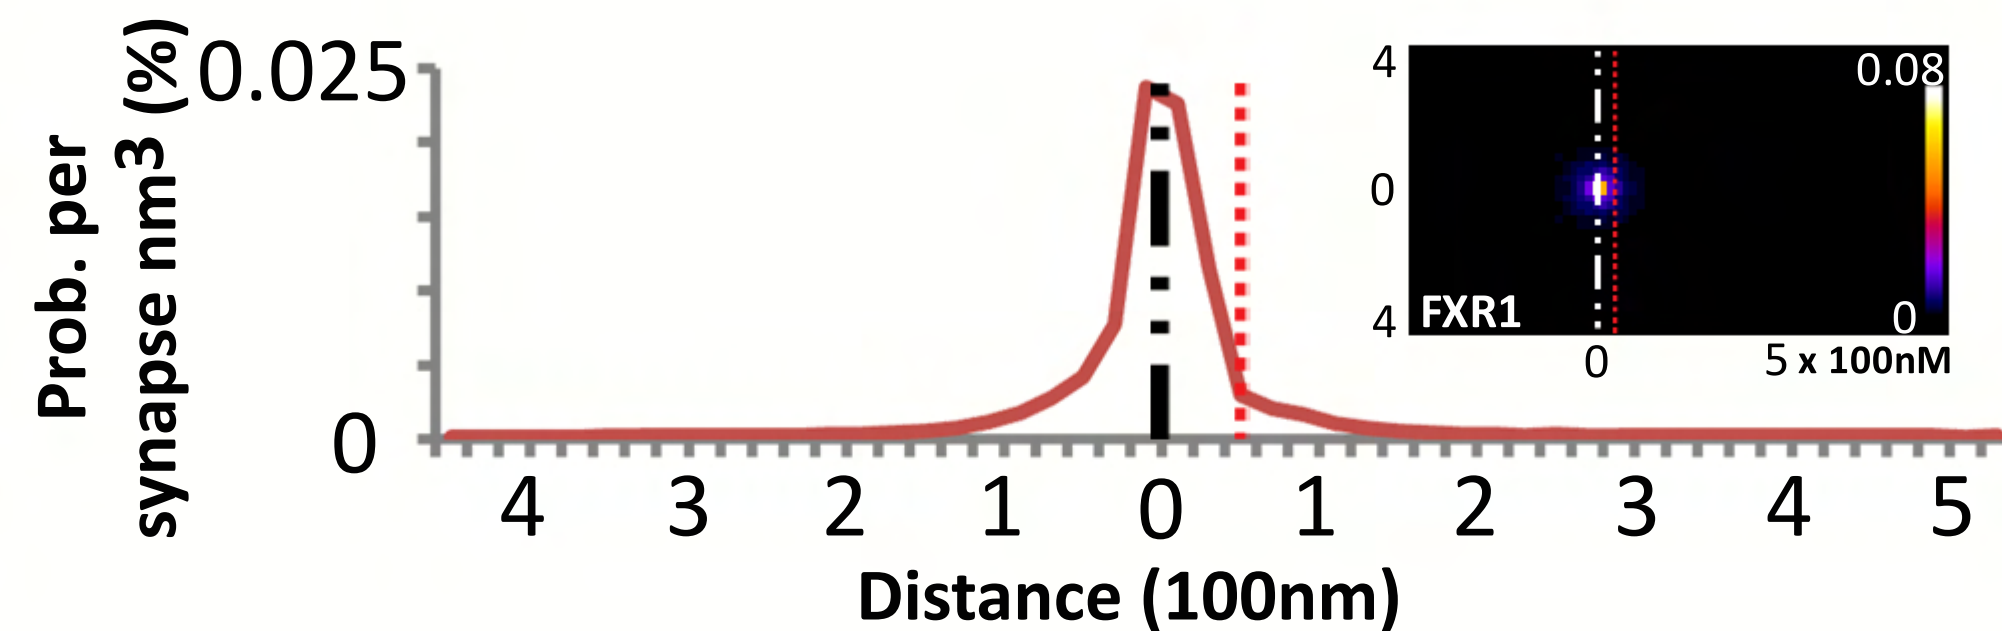**b****VGluT2**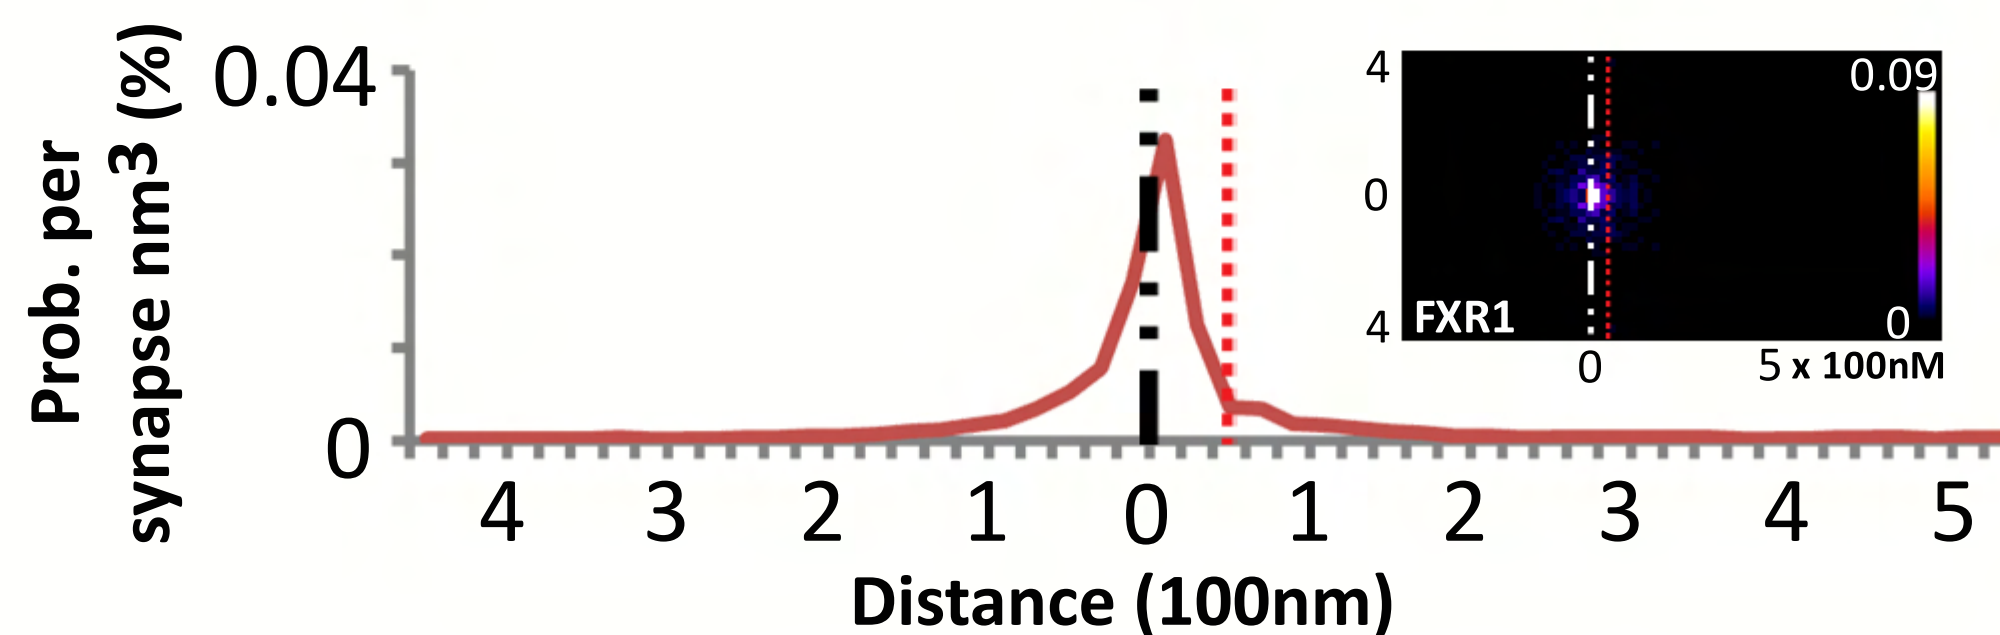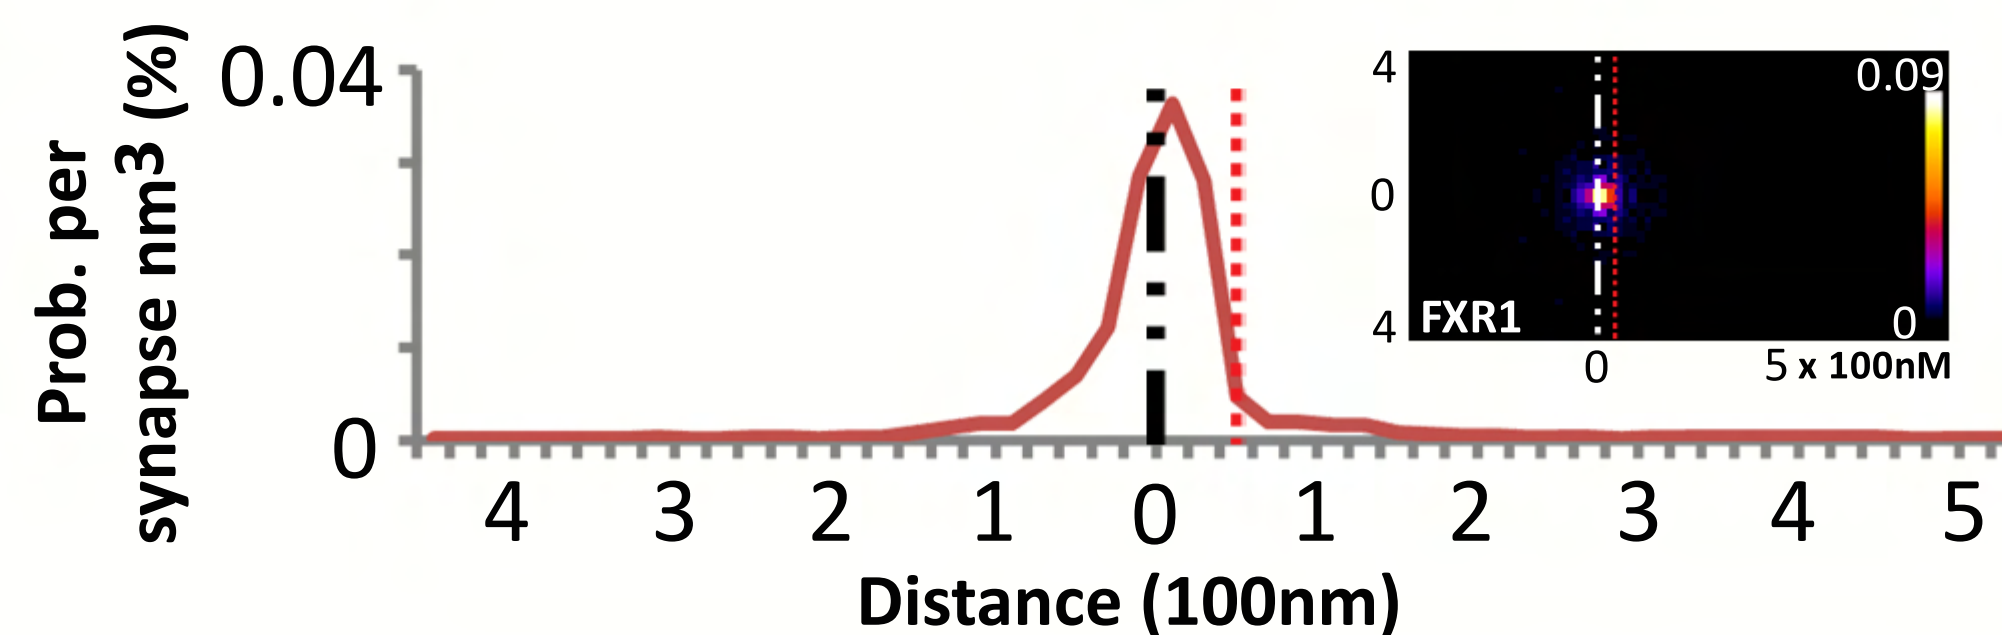**c****Layer 4 (*Fmr1* WT) FXR1P****VGluT1**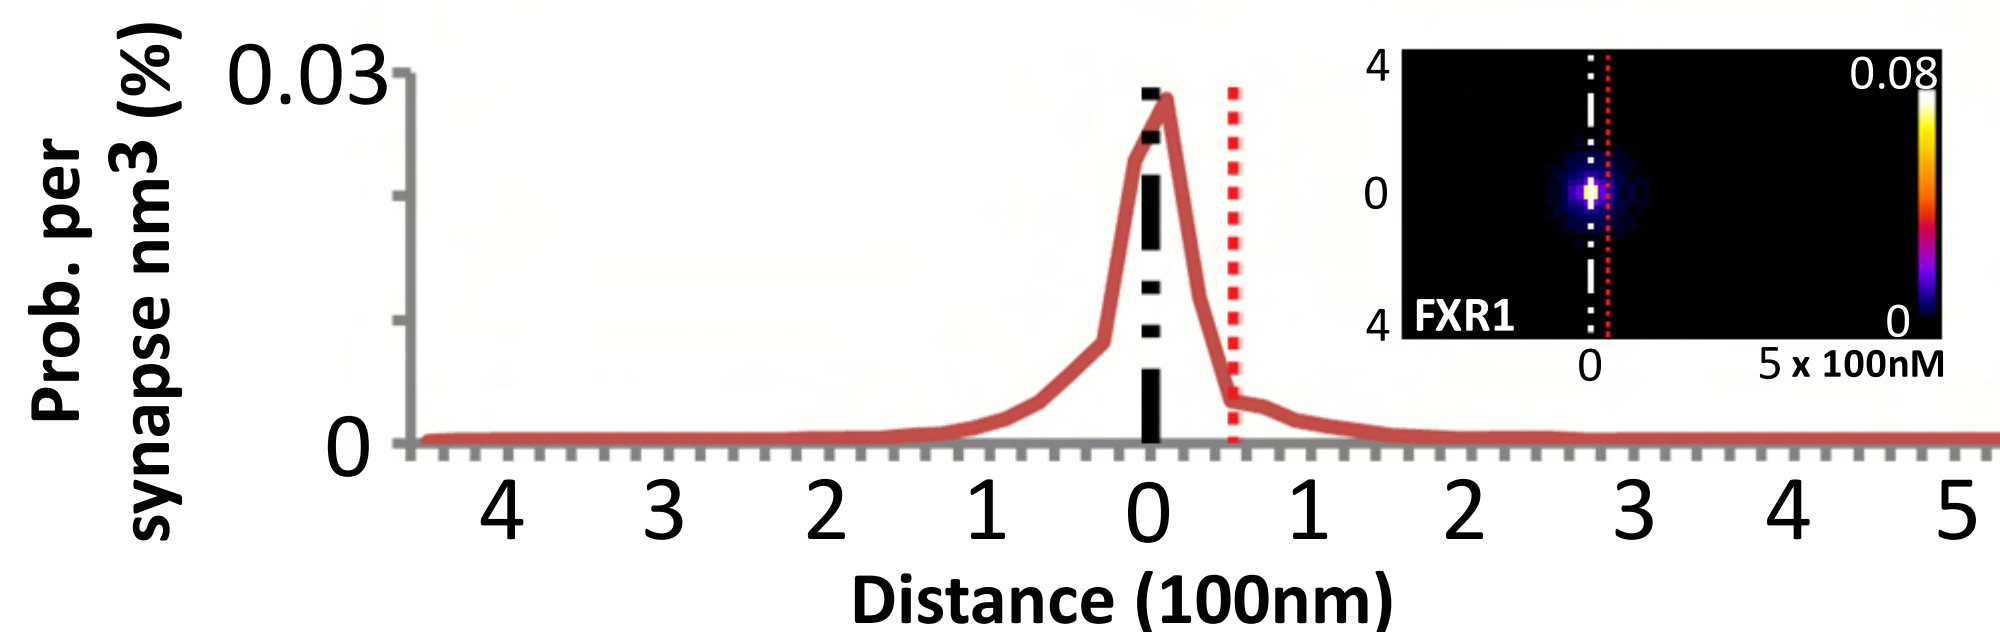**Layer 4 (*Fmr1* KO) FXR1P**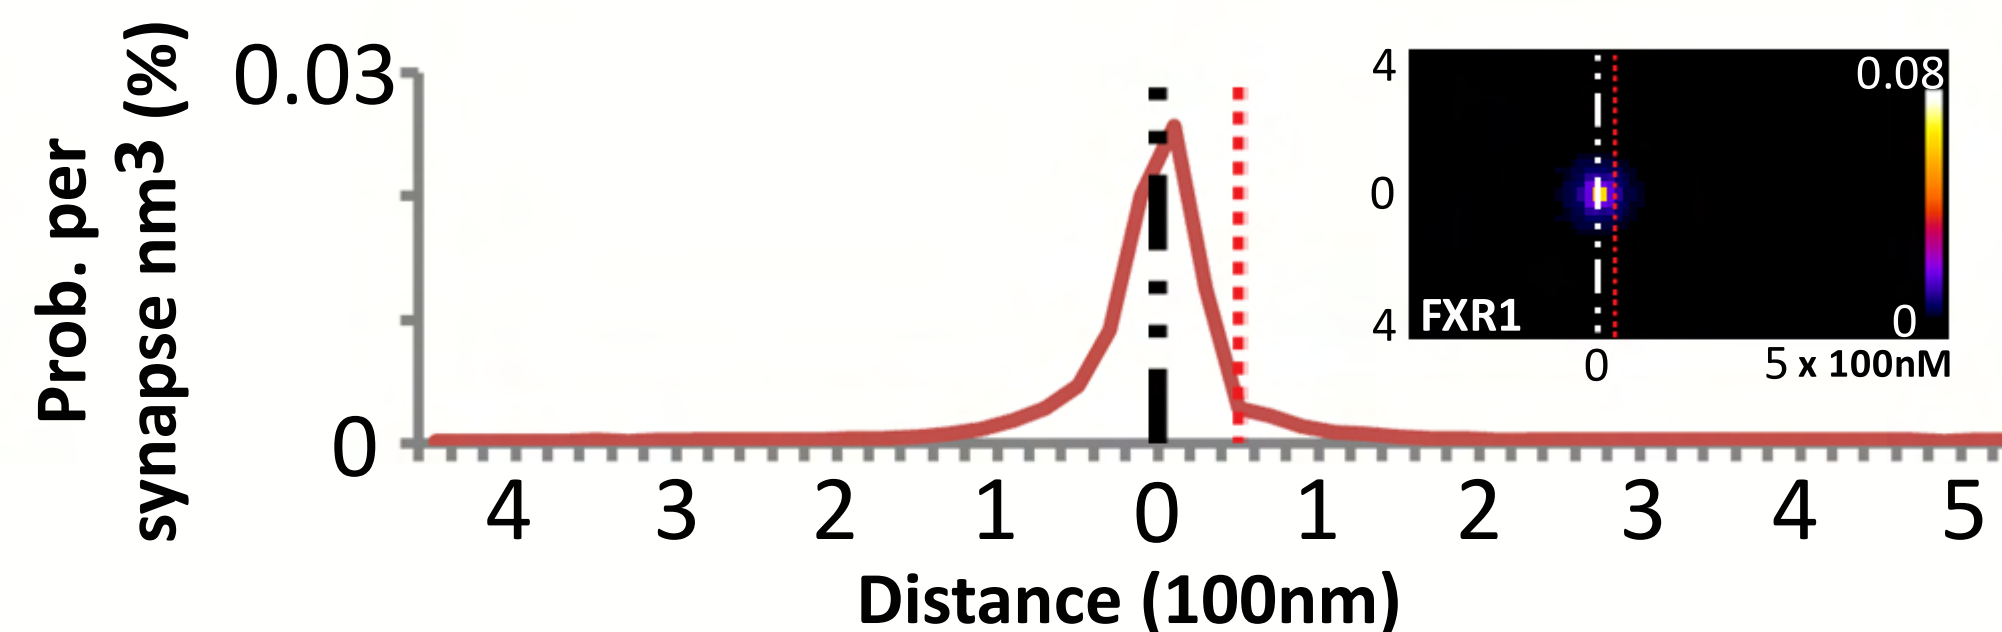**d****VGluT2**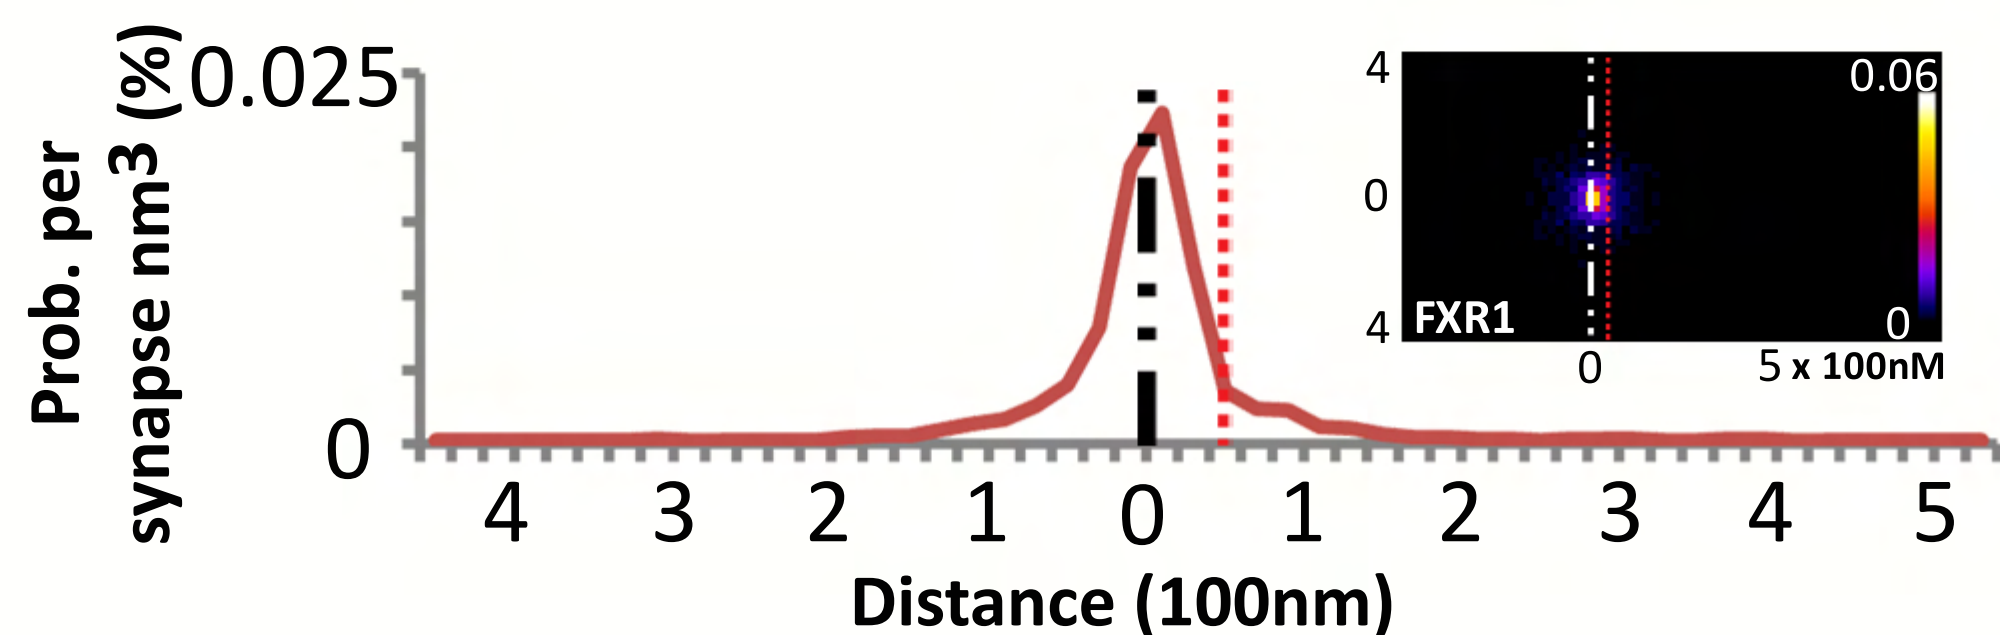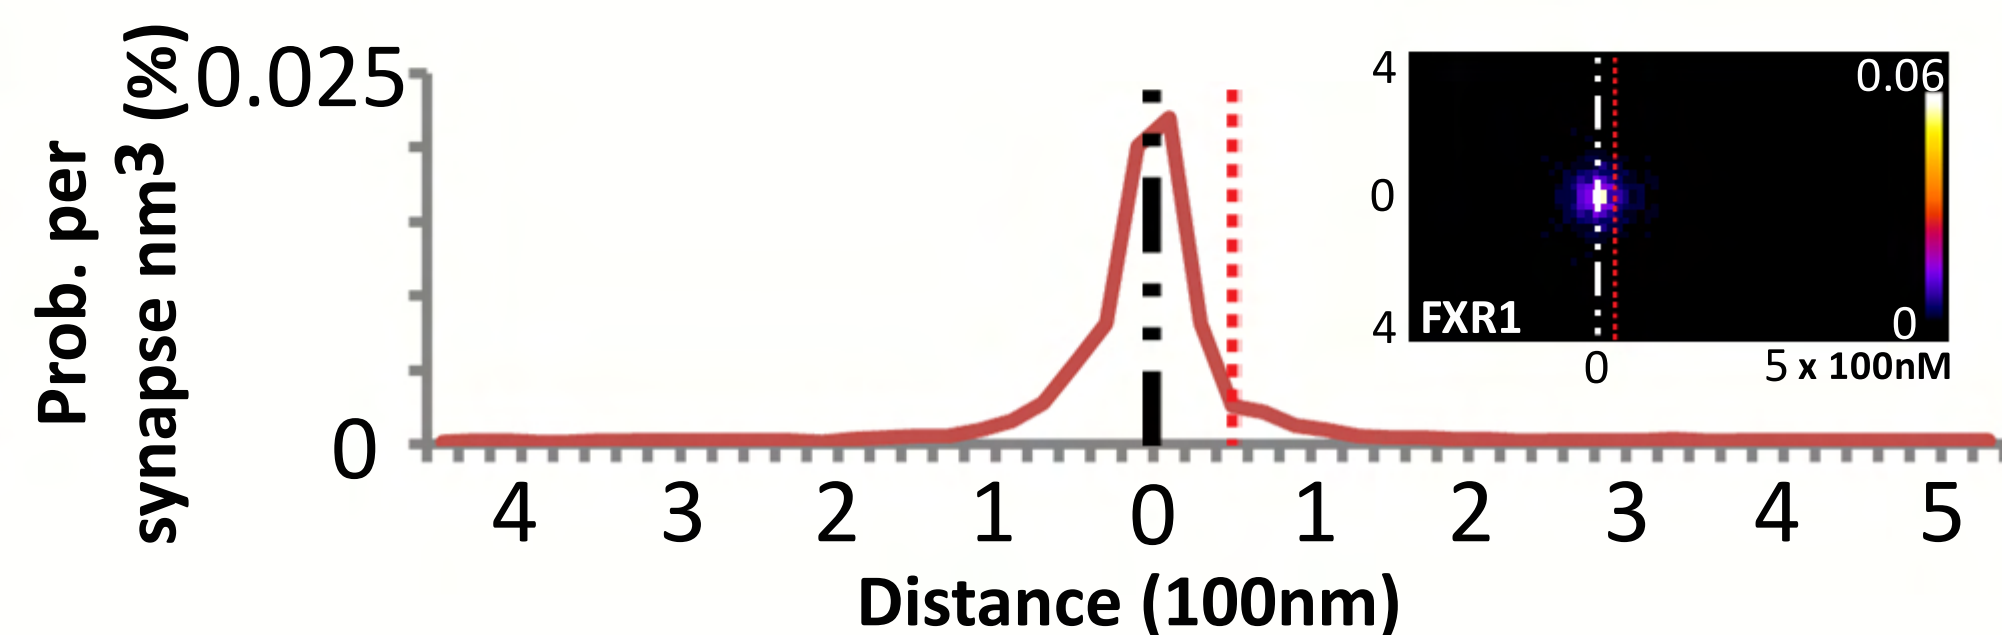

Supplement: supp [file elife-20560-supp-v1.zip]
