# Supplementary figures and images for: Sub-synaptic, multiplexed analysis of proteins reveals Fragile X related protein 2 is mislocalized in Fmr1 KO synapses
Source: eLife journal article supplement (doi:10.7554/elife.20560), 2016-10-22

**A** *Excitatory Synapses: VGluT1*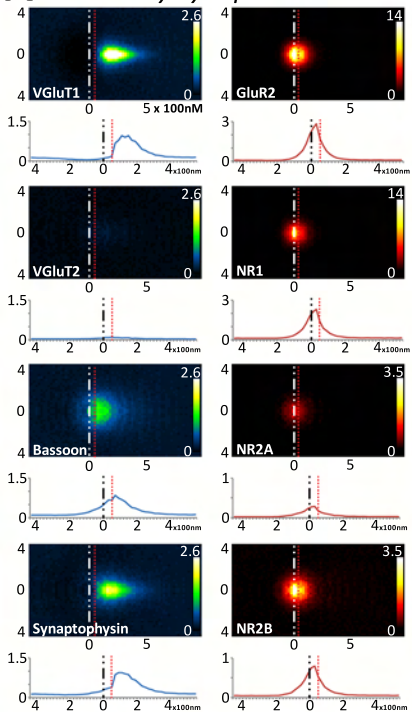**B** *Excitatory Synapses: VGluT2*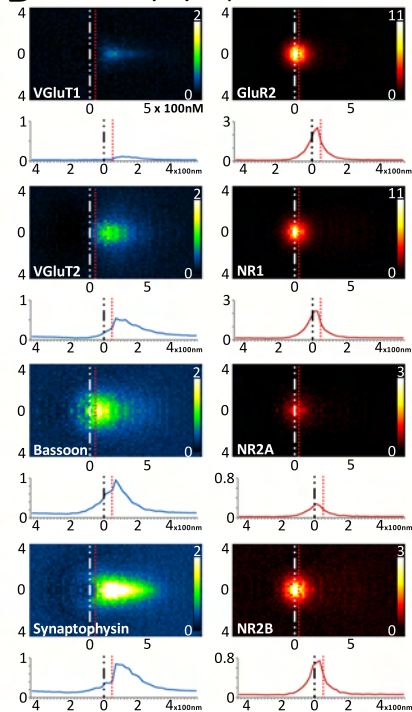**C** *Inhibitory Synapses*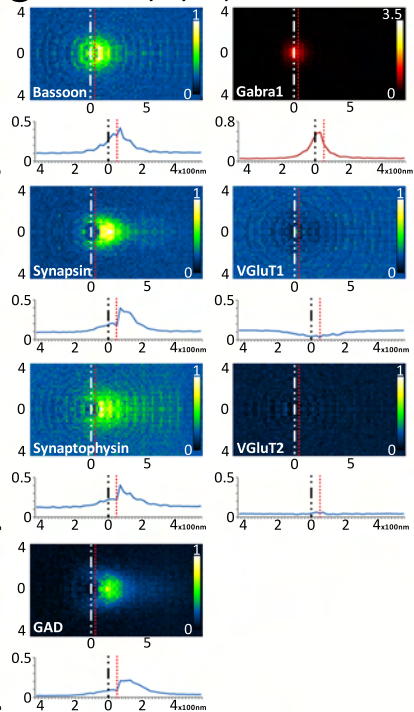

Supplement: supp [file elife-20560-supp-v1.zip]

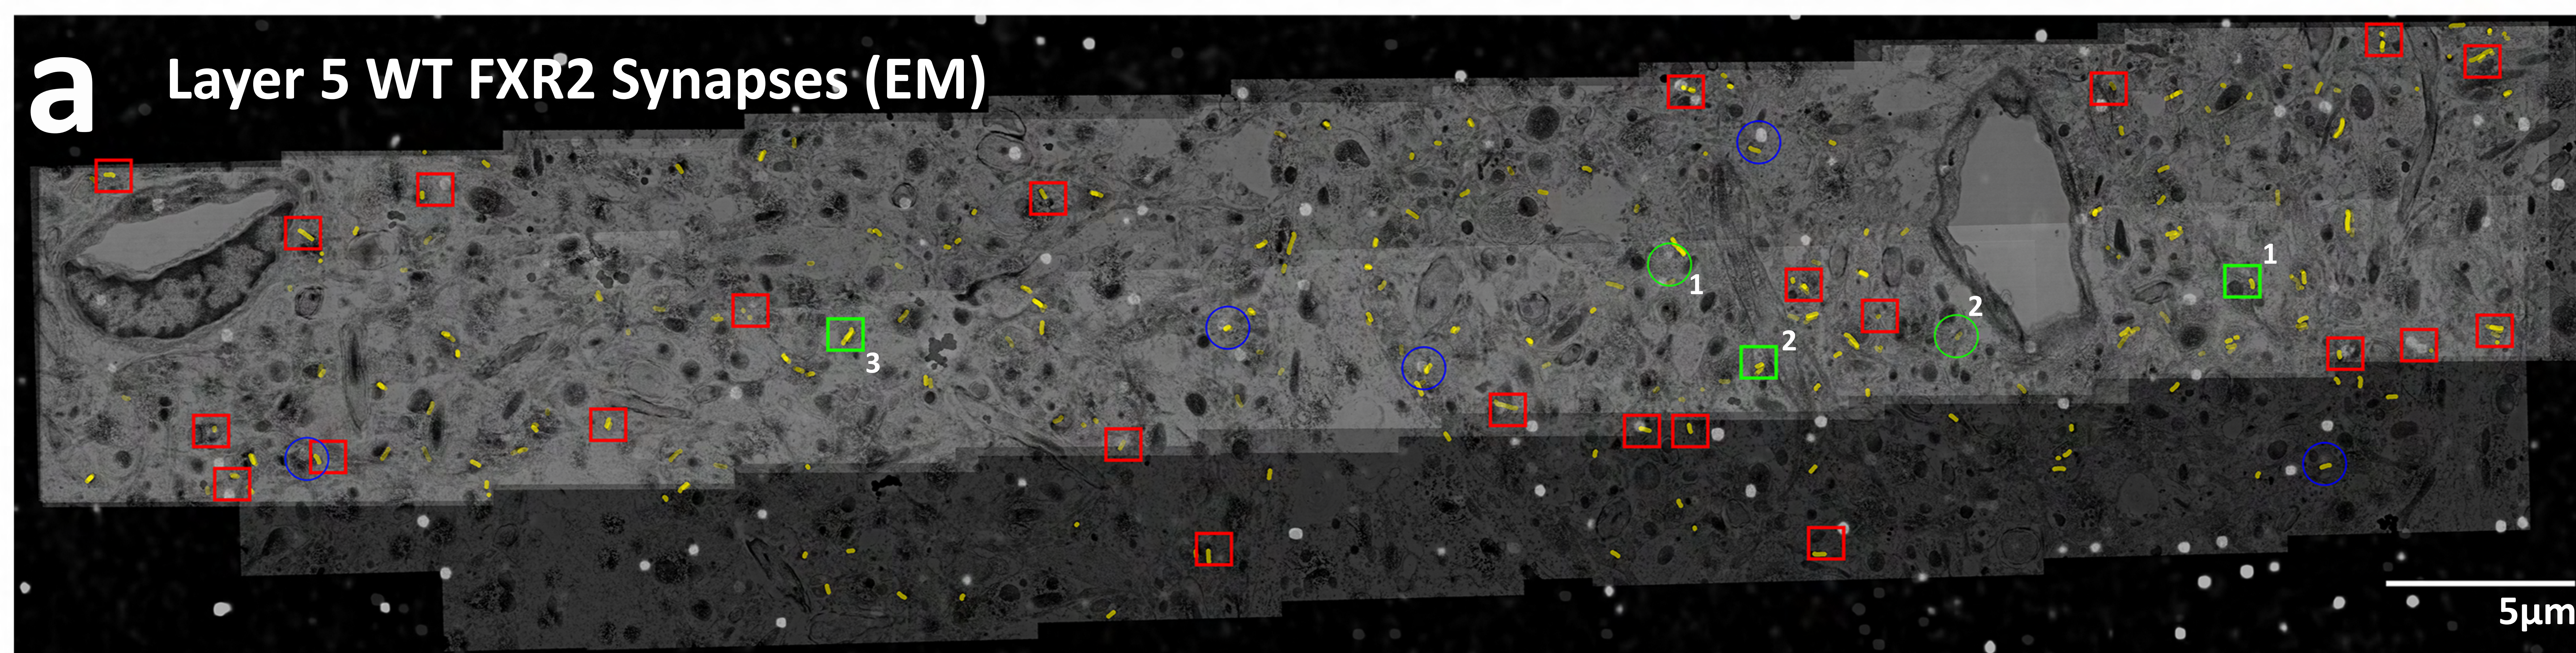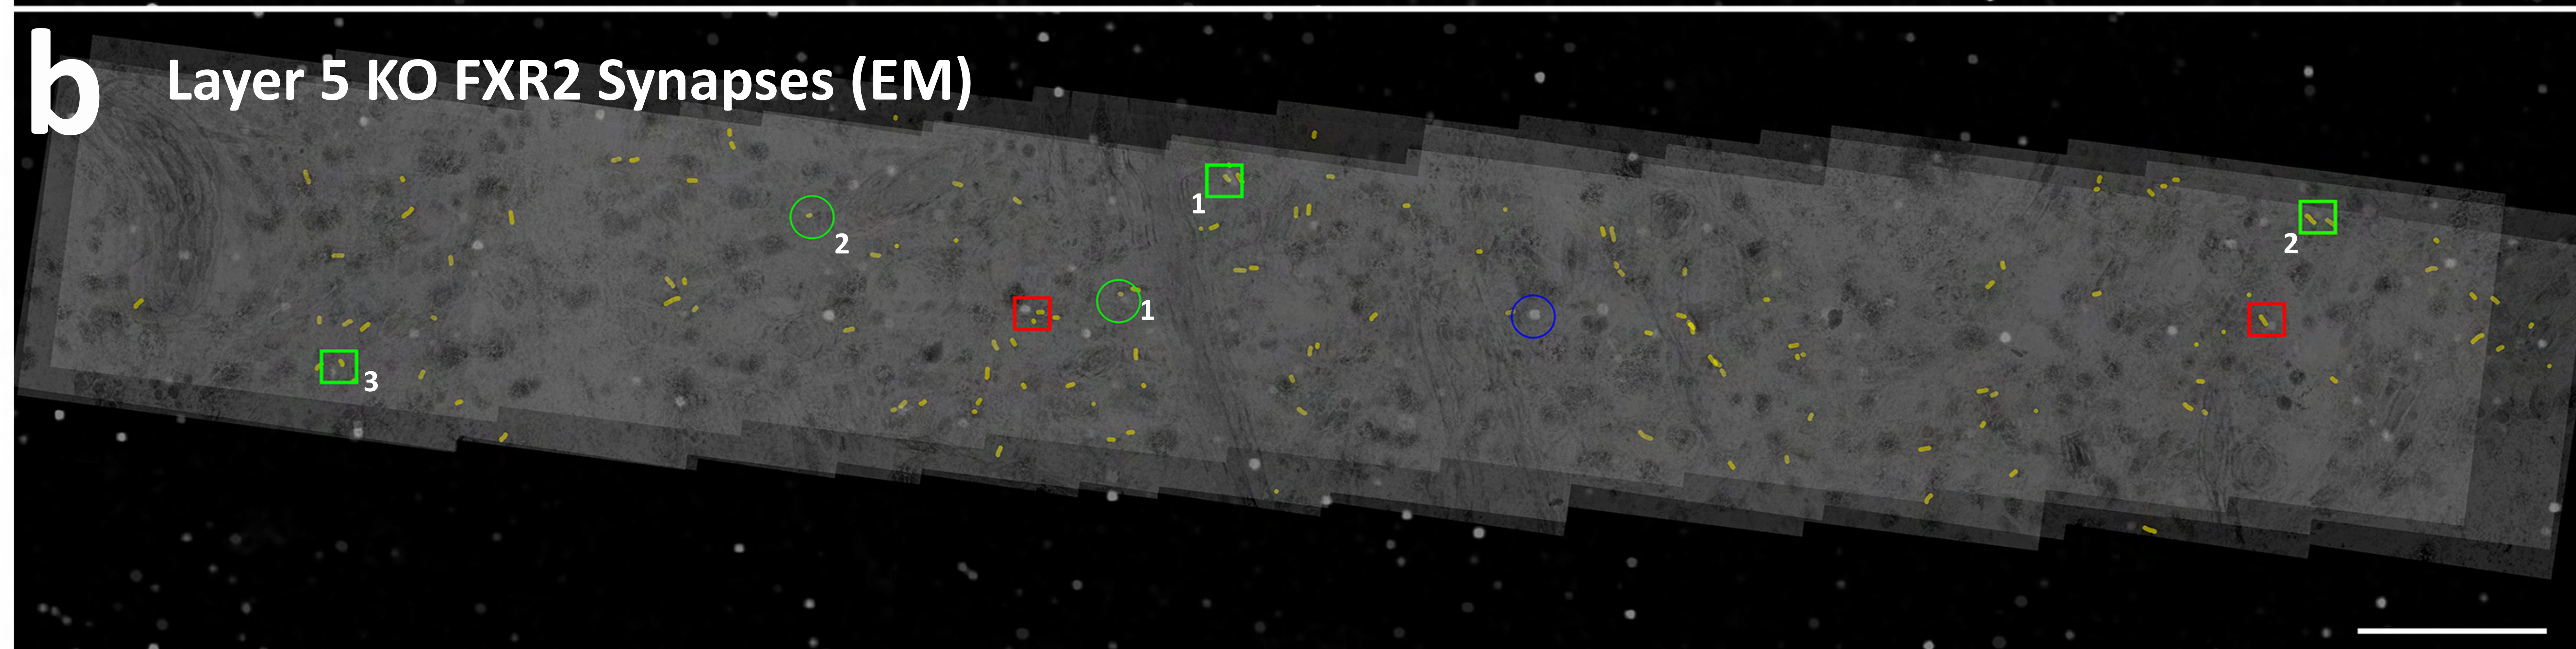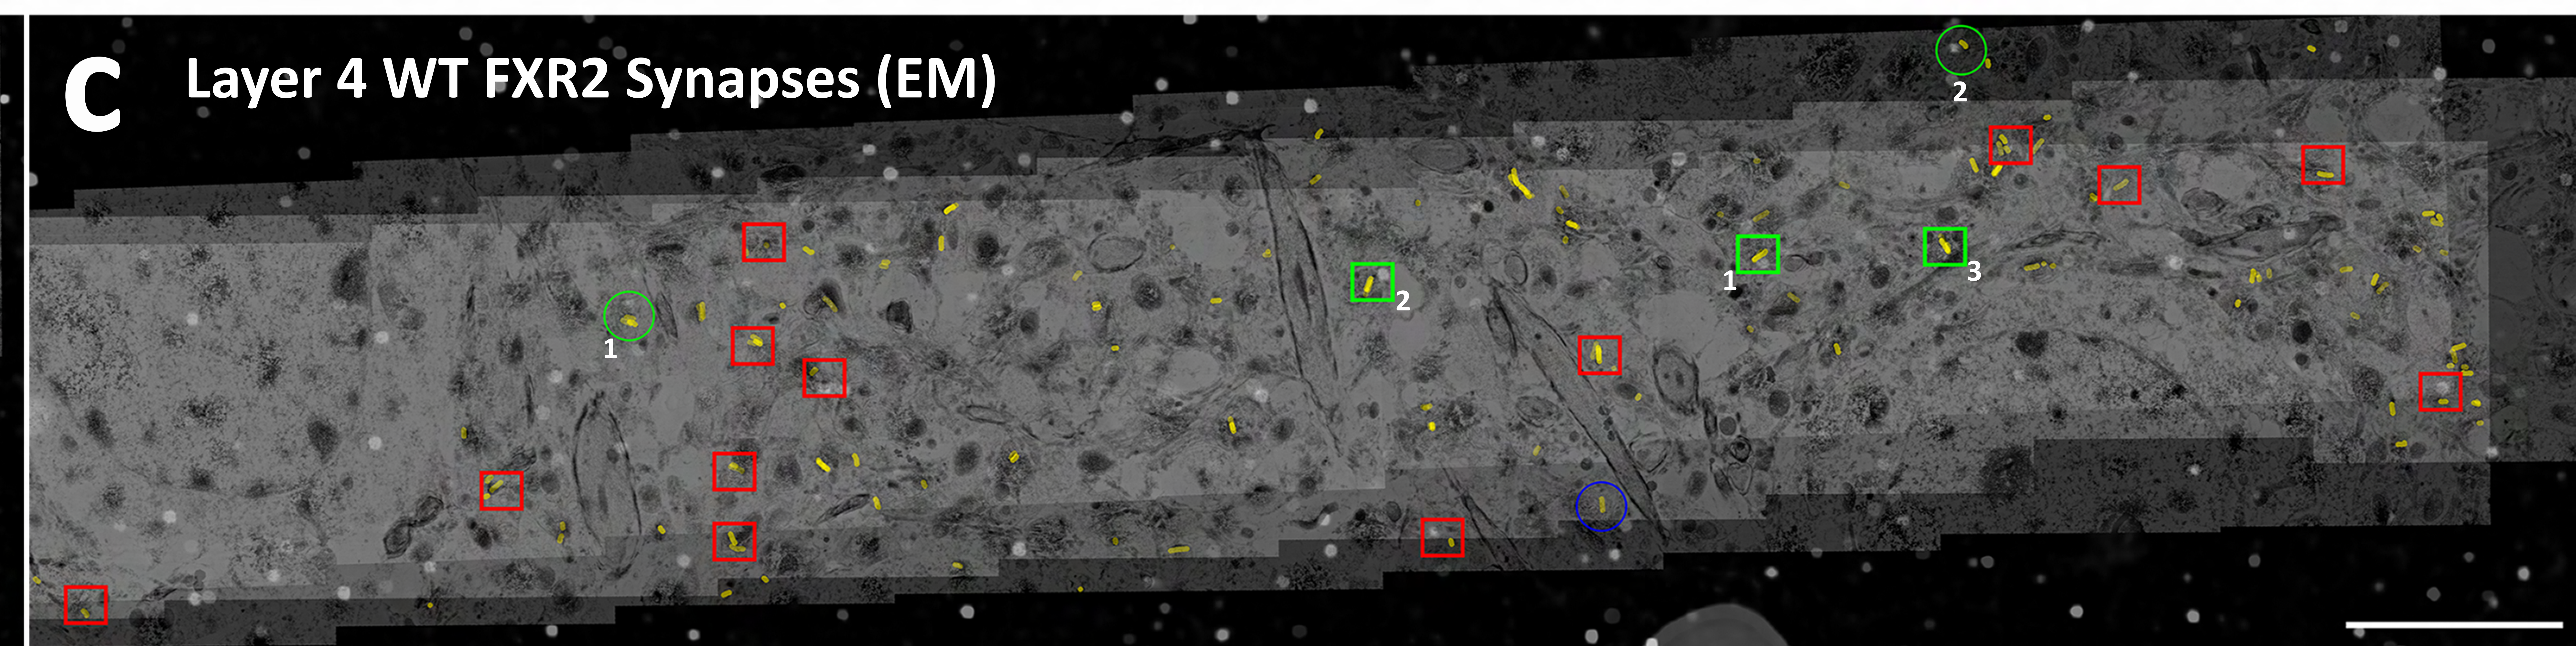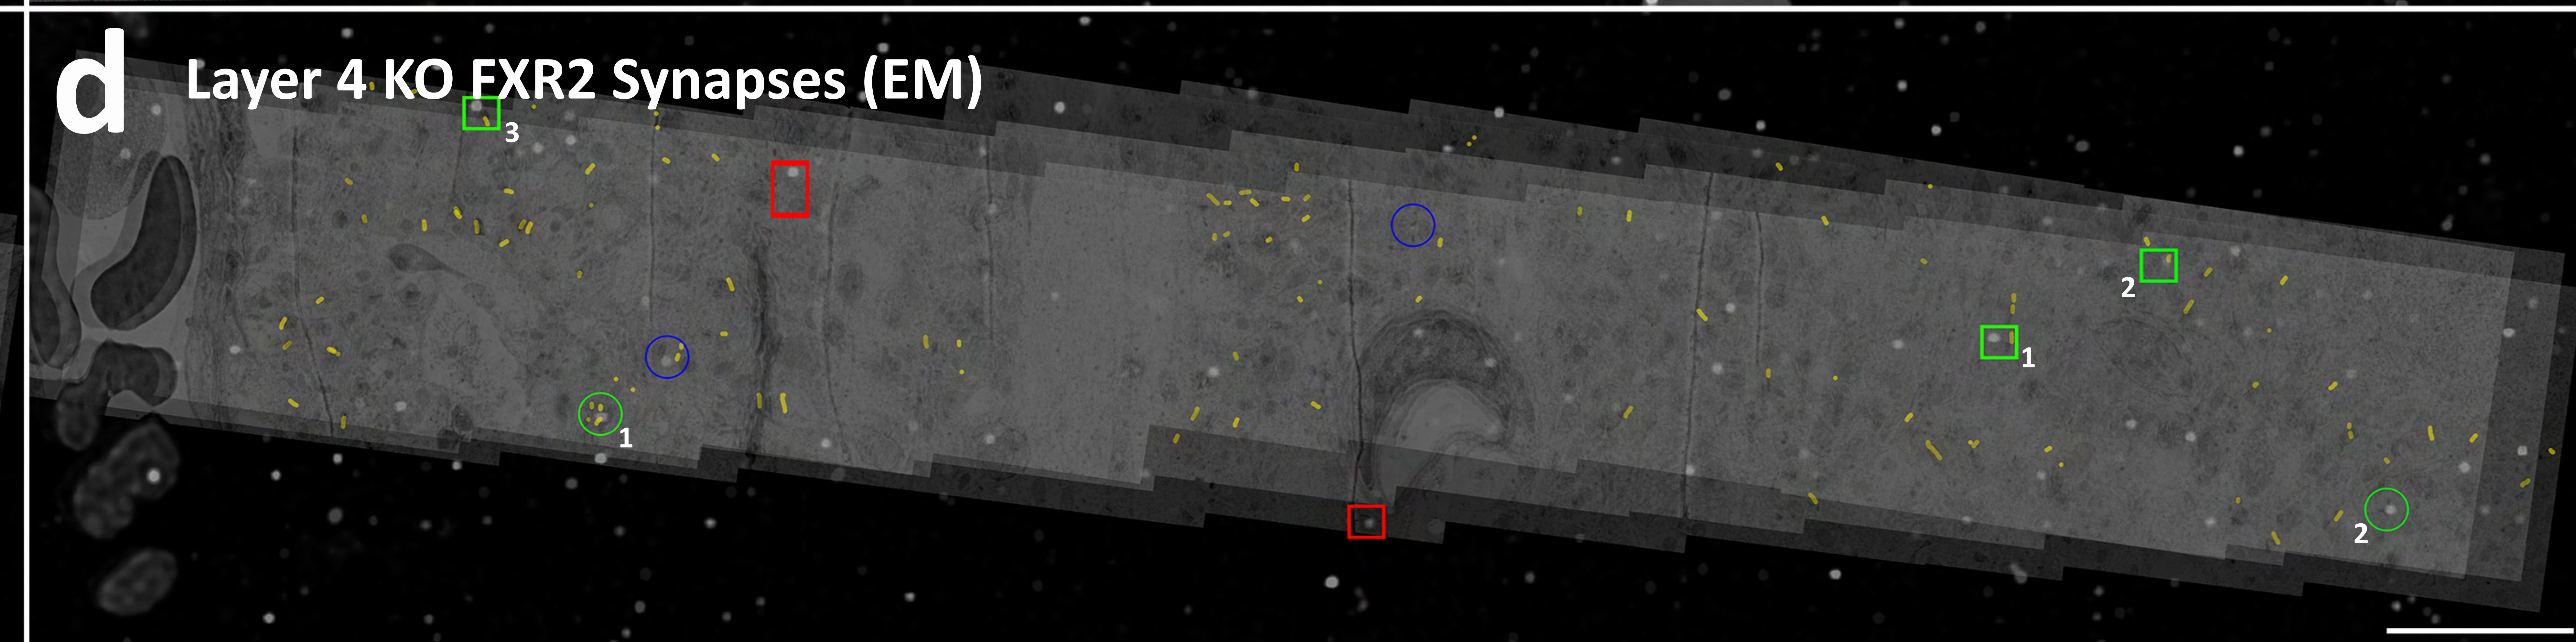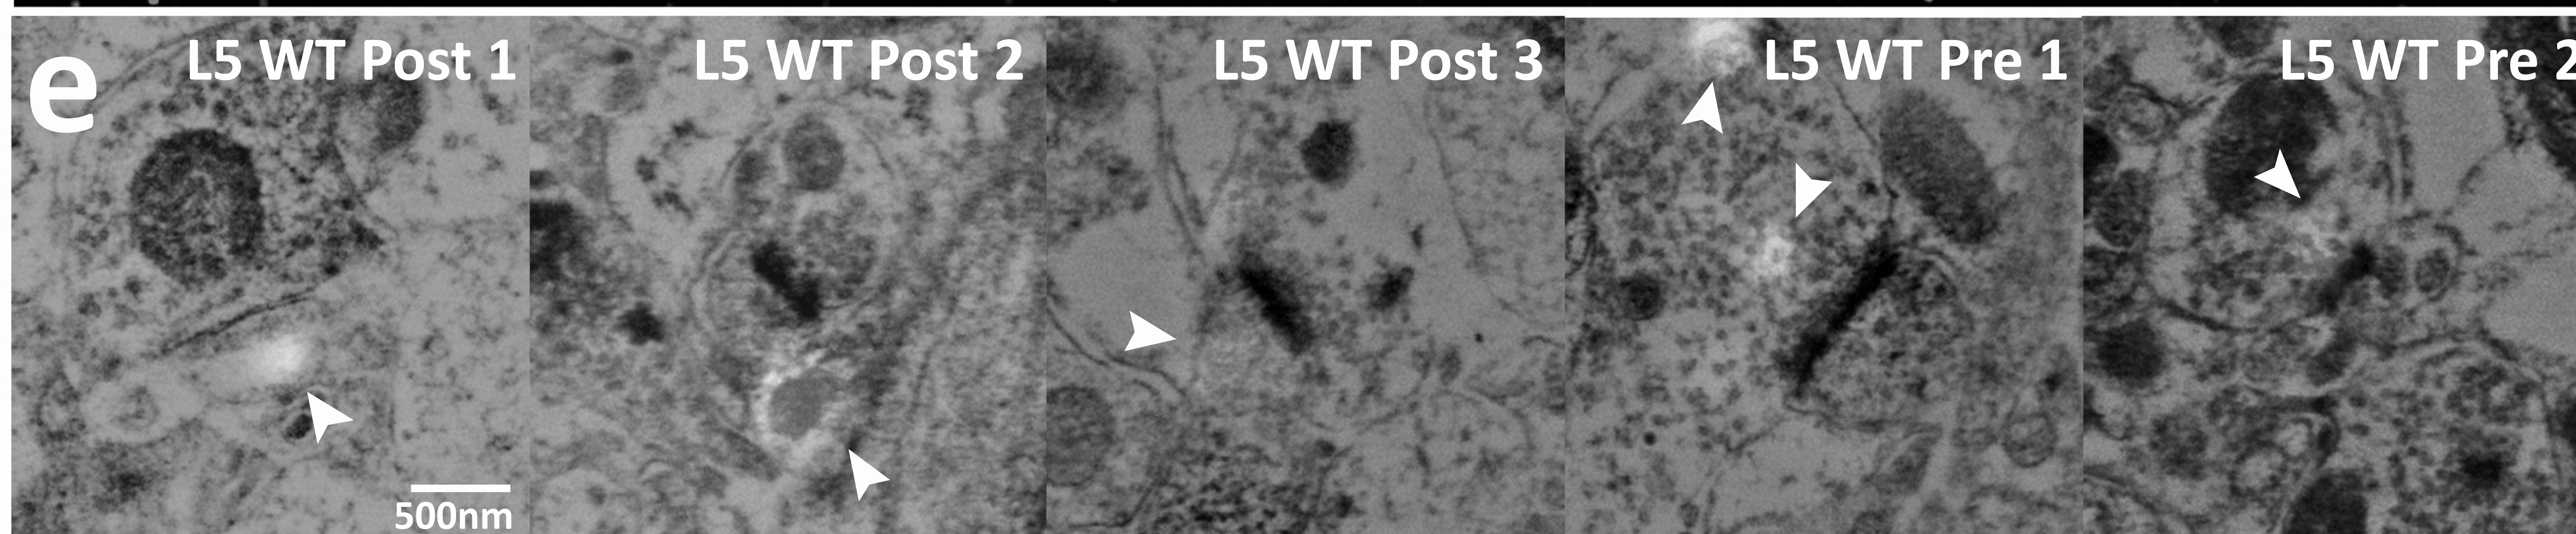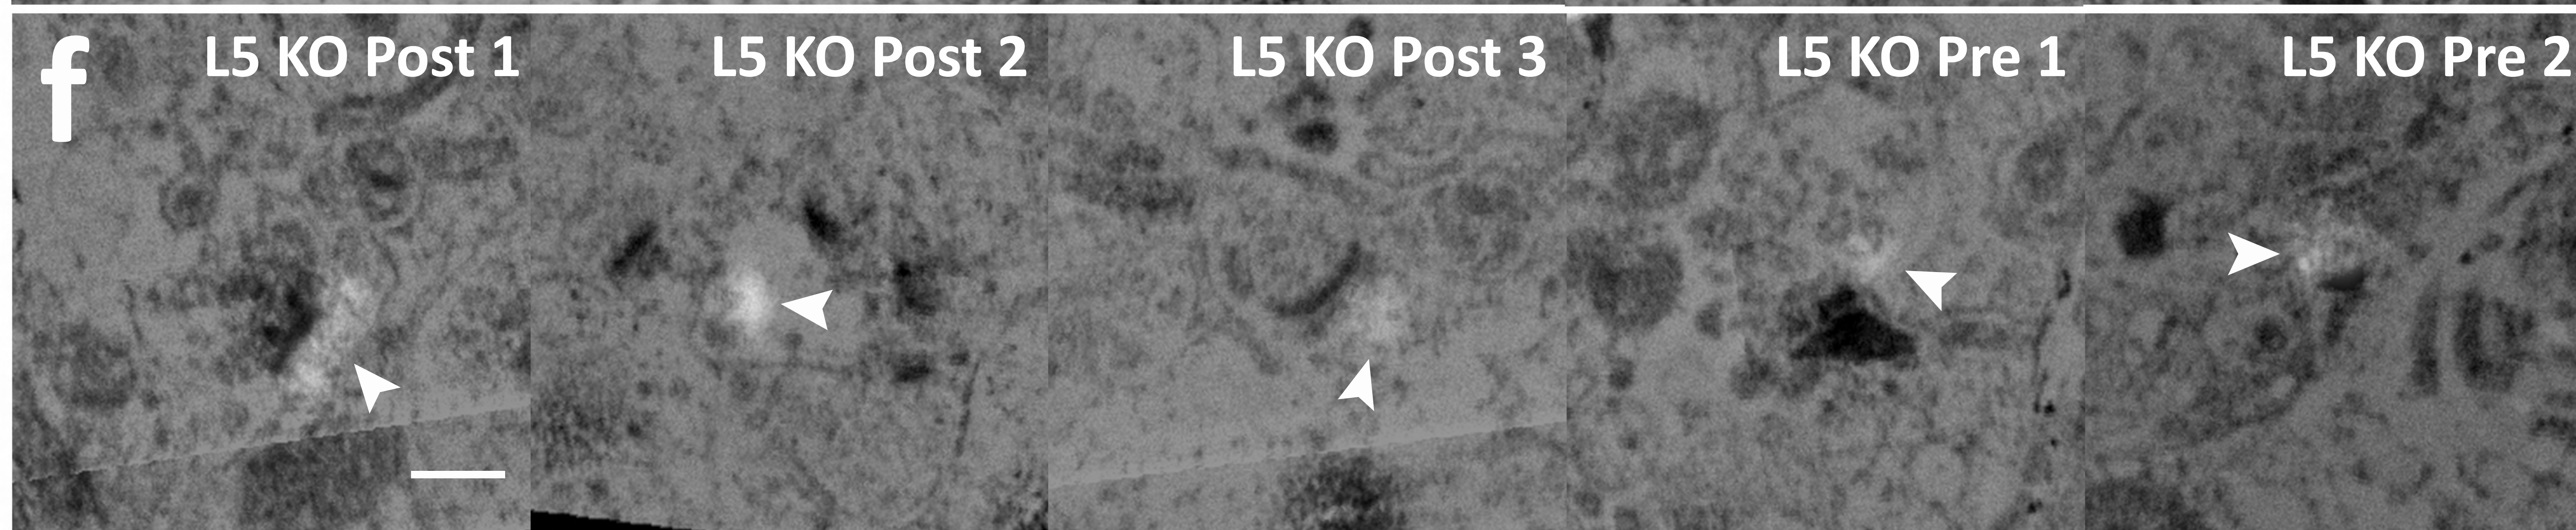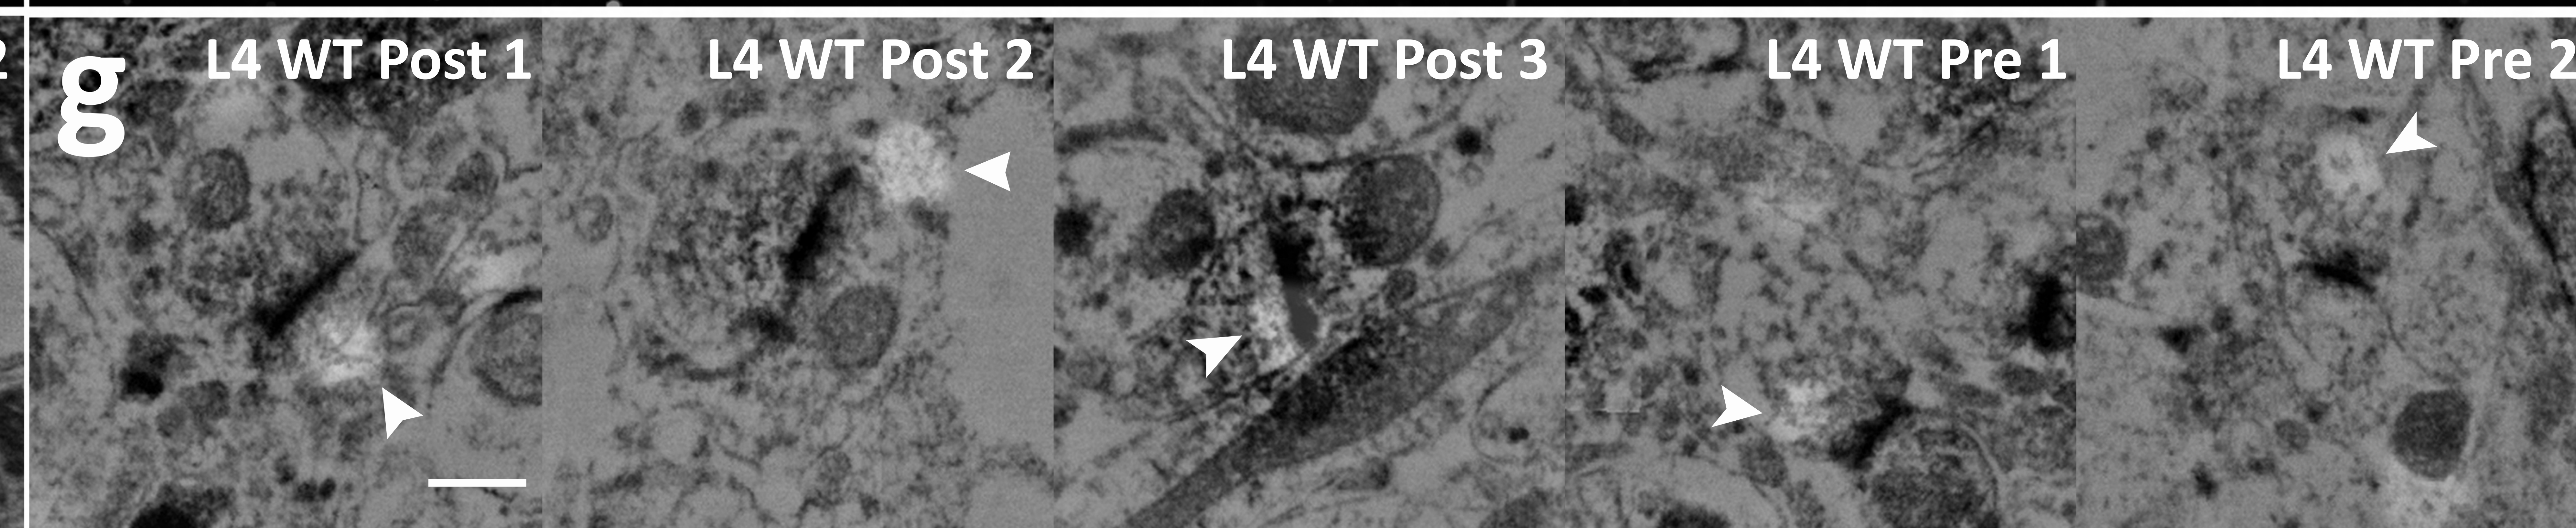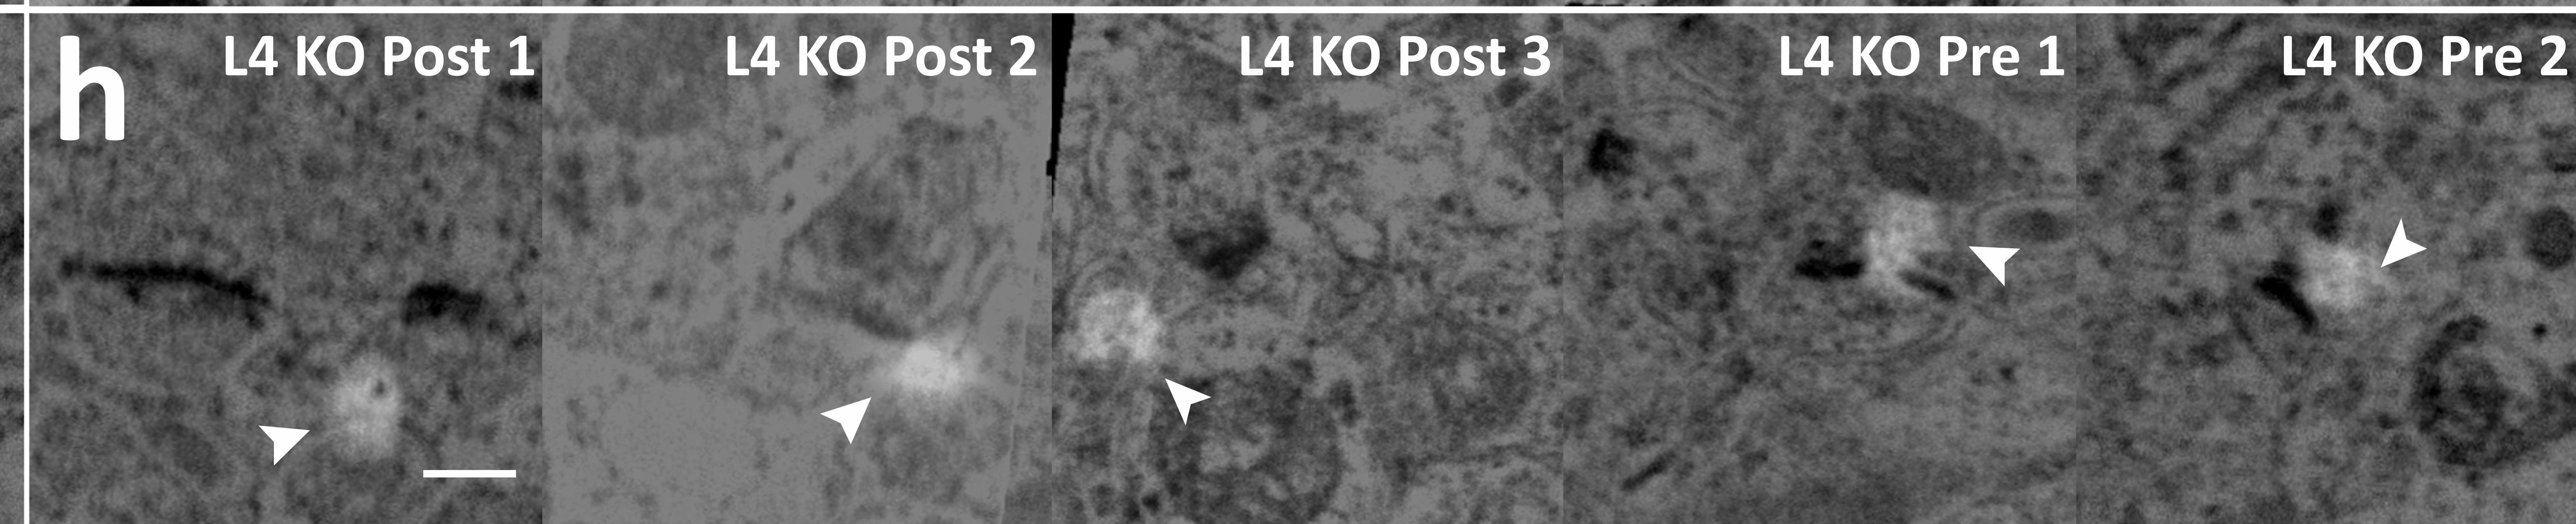

Supplement: supp [file elife-20560-supp-v1.zip]

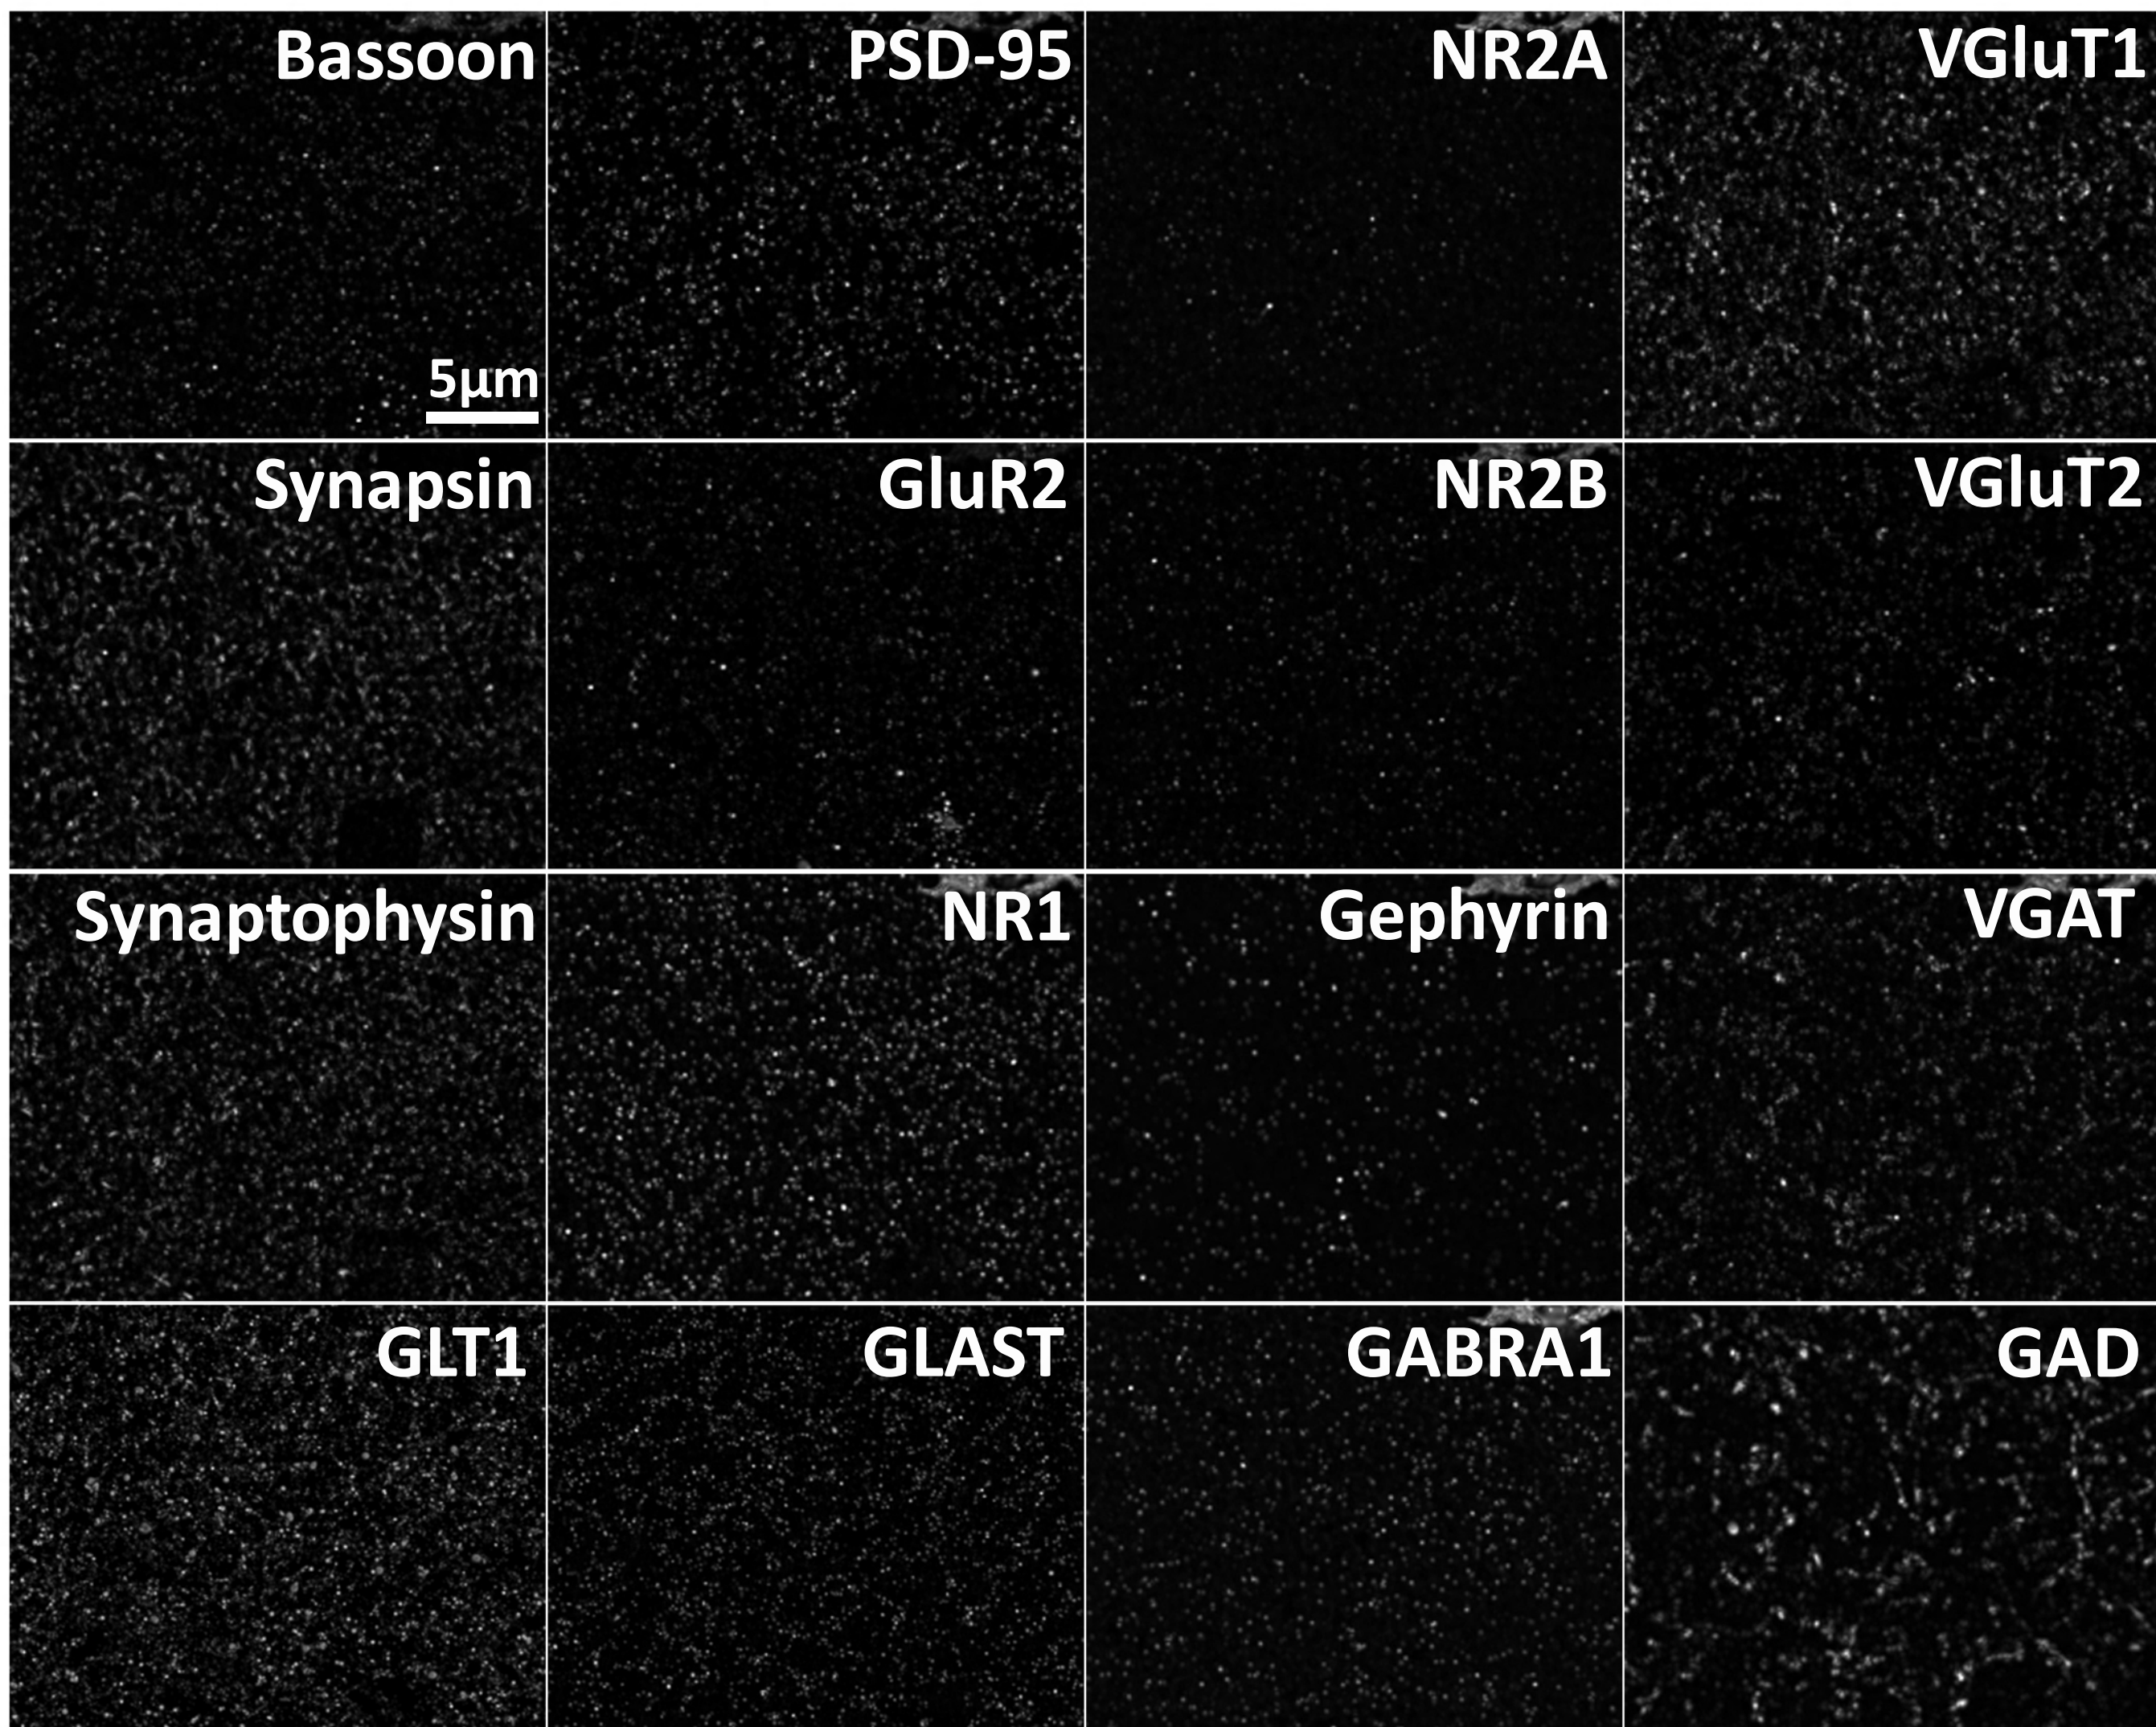

Supplement: supp [file elife-20560-supp-v1.zip]

# VGluT1

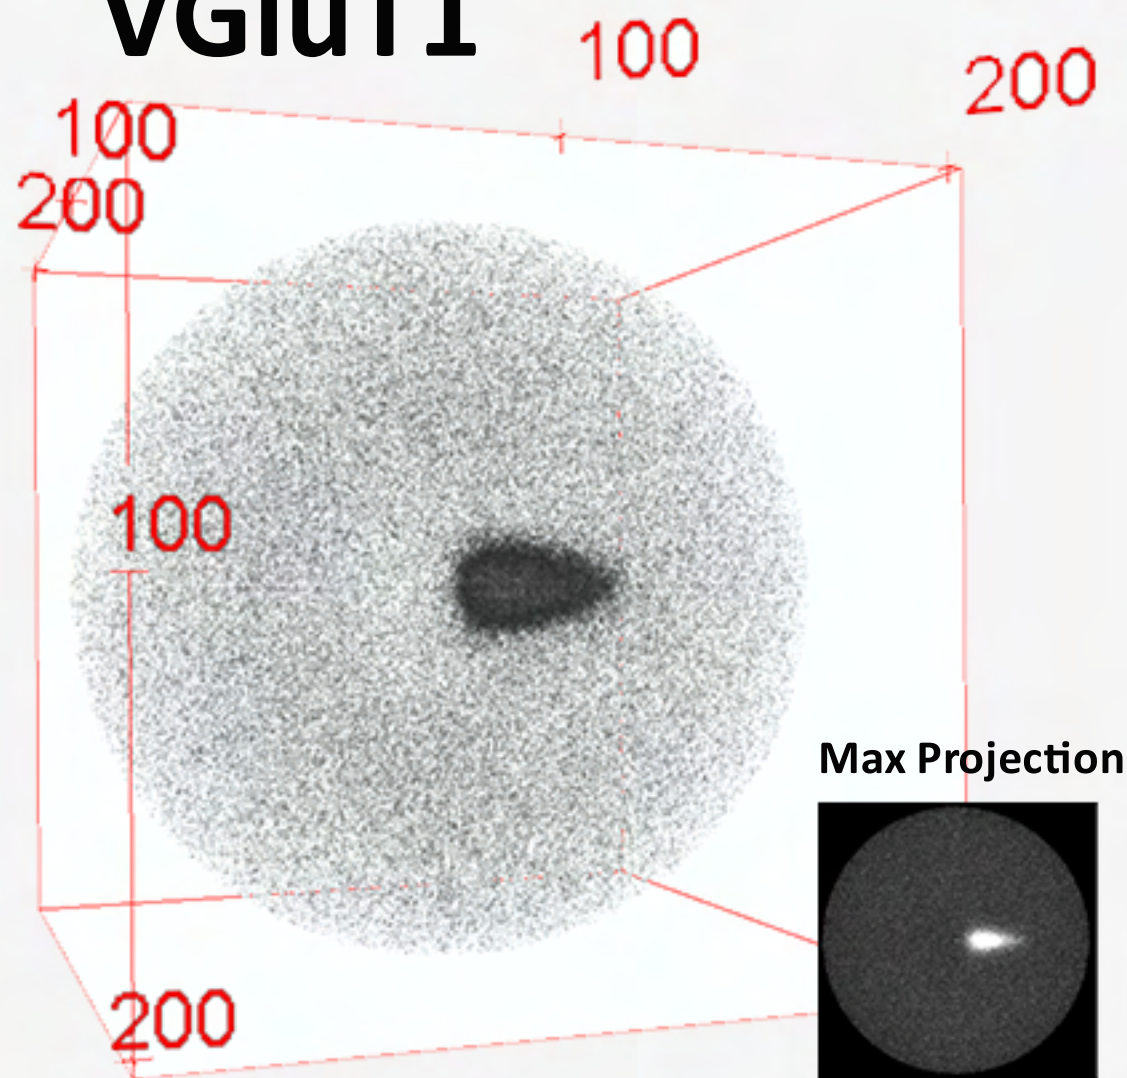

# GluR2

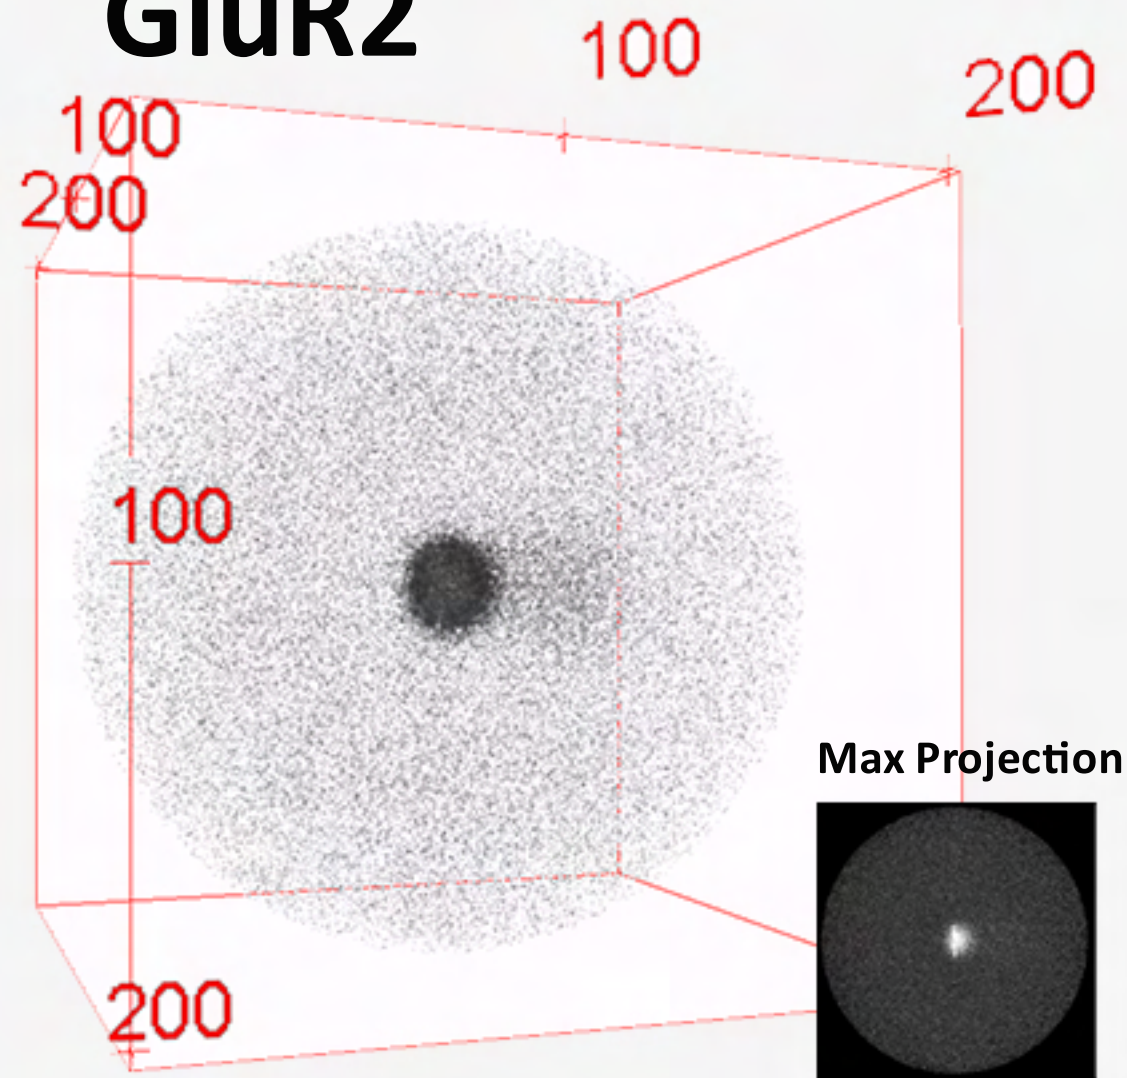

# NR1

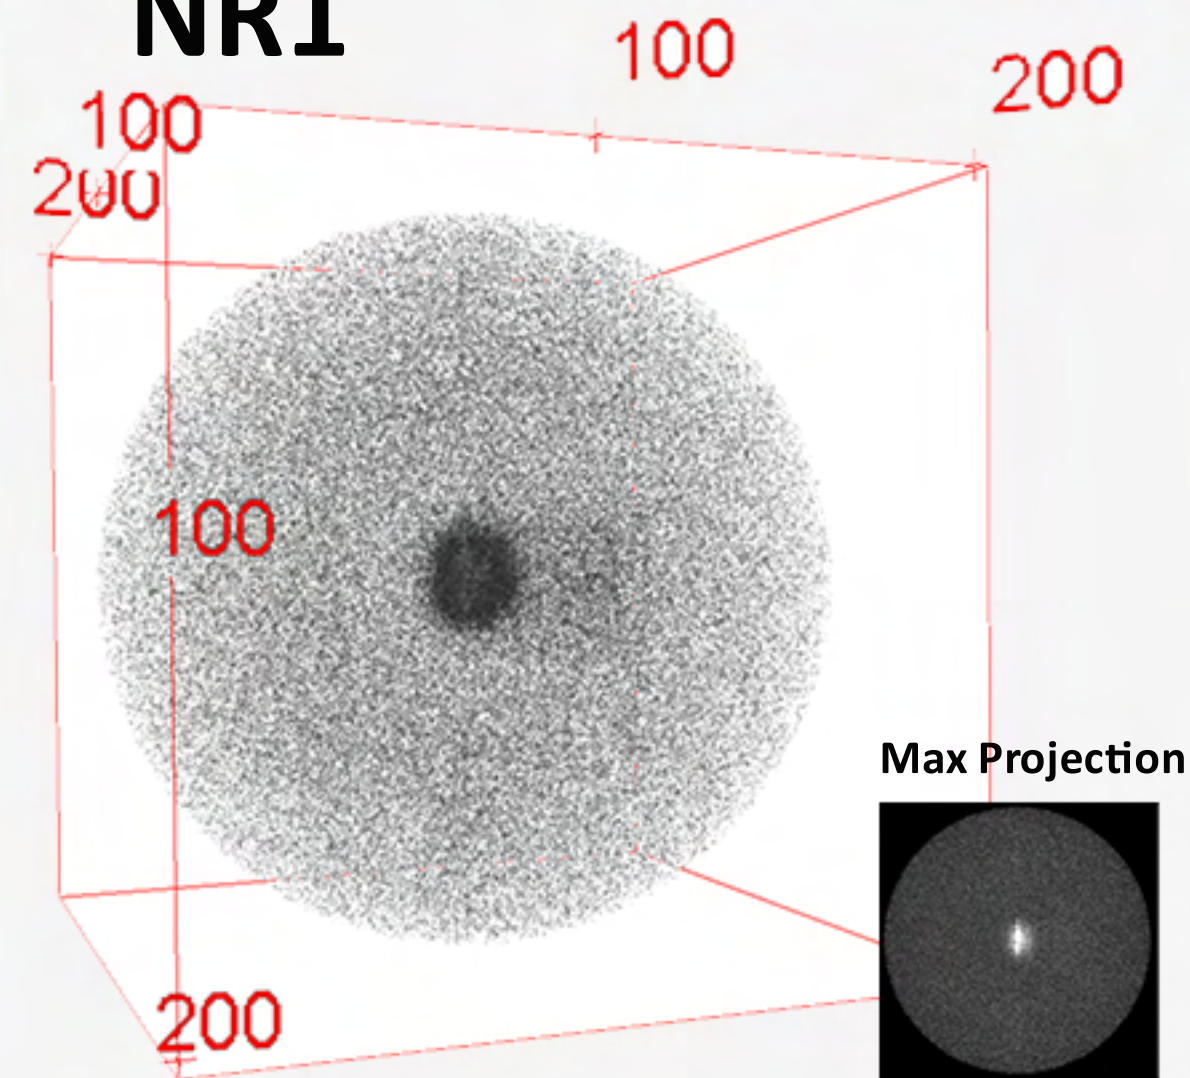

# VGluT1 Random

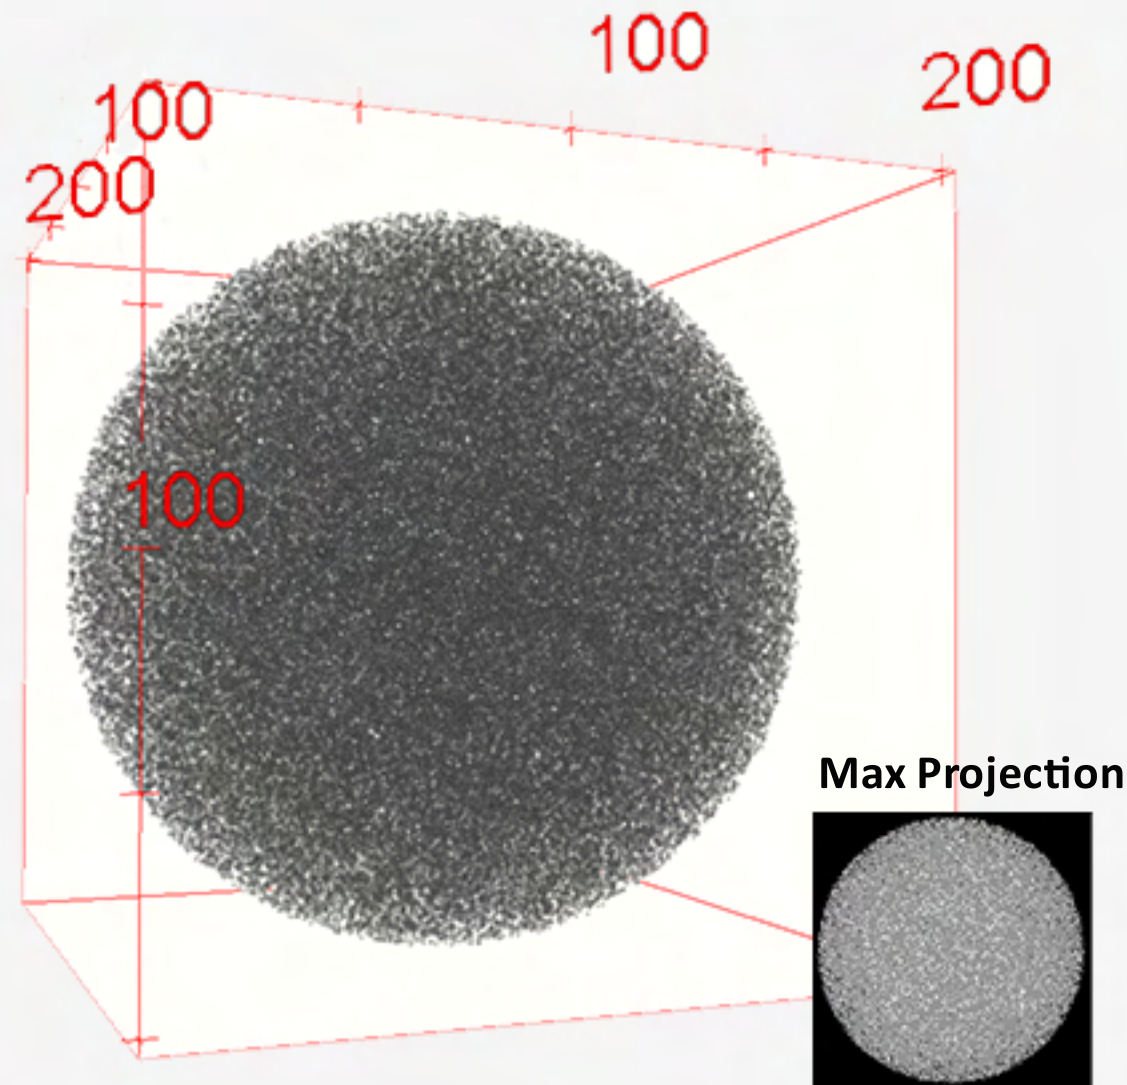

# VGluT1 + GluR2

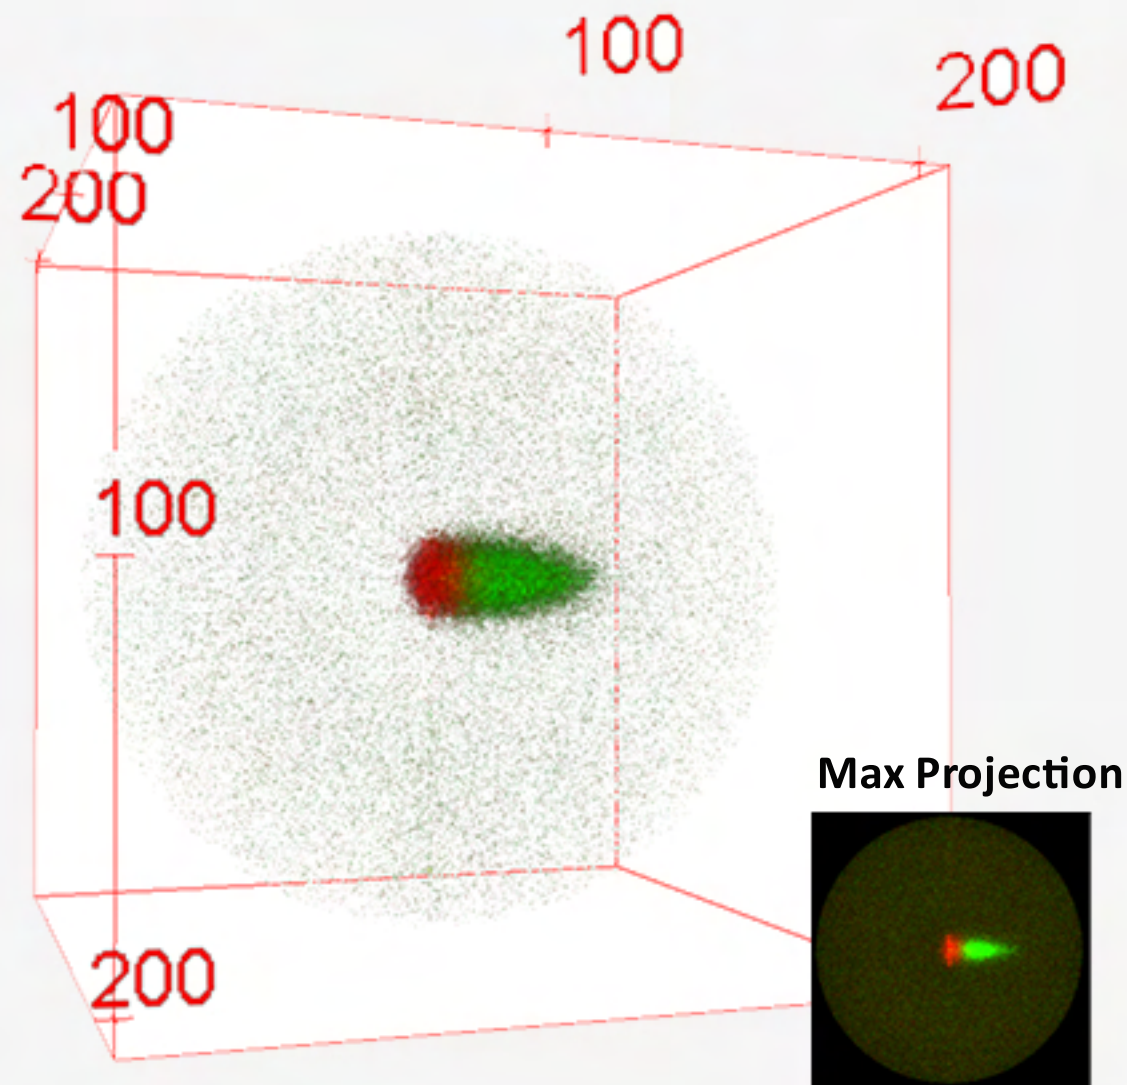

# Synph

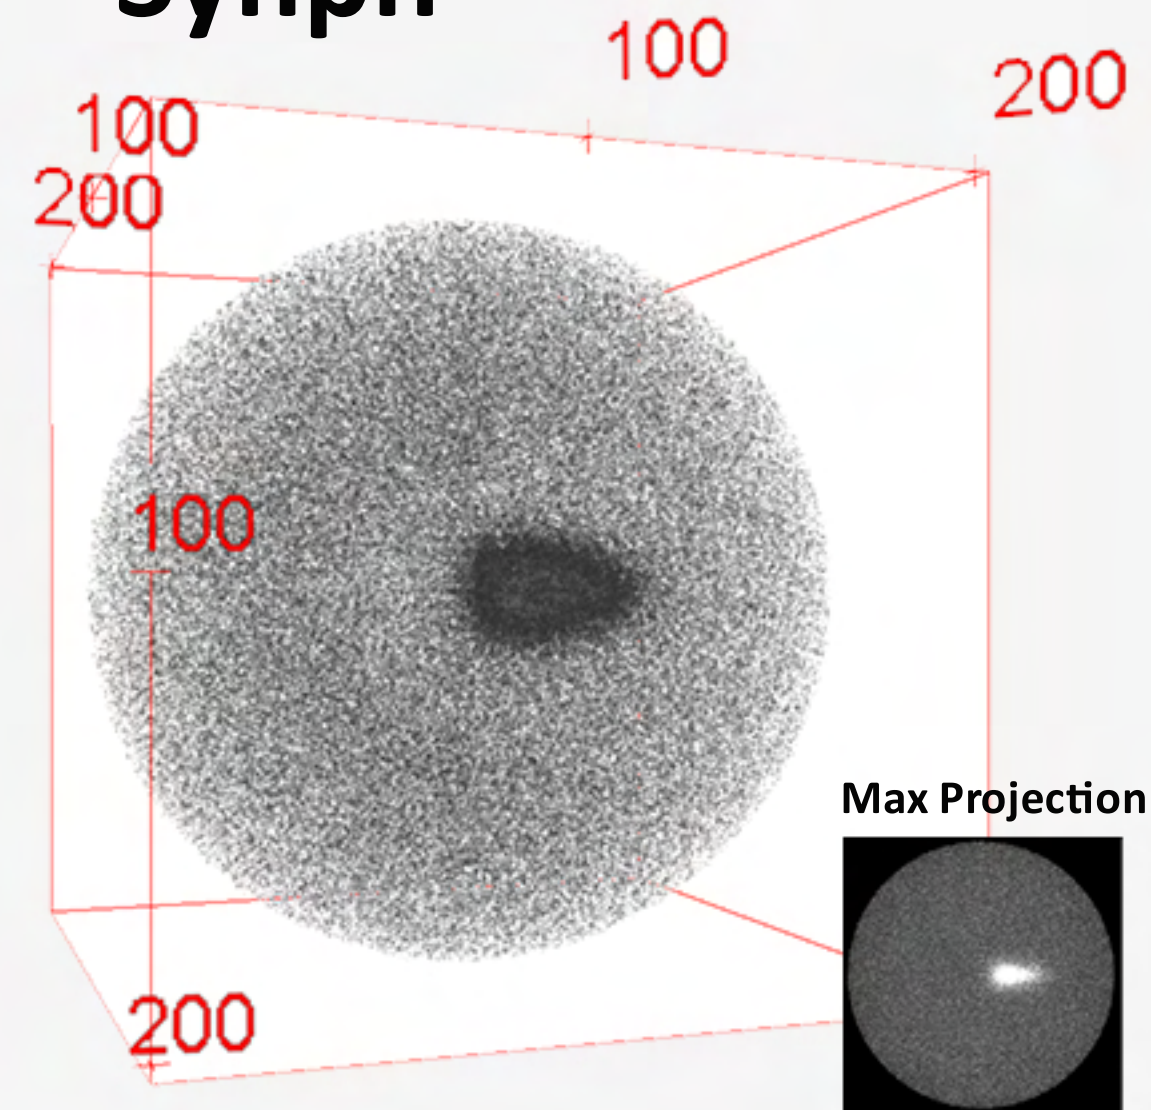

Supplement: supp [file elife-20560-supp-v1.zip]
